# Supplementary material for: Photoelectron spectroscopy and density functional theory studies of (fructose + (H2O)n)− (n = 1–5) anionic clusters
Source: Royal Society of Chemistry journal article supplement (doi:10.1039/c7cp06625b), 2017-01-01
Supplement: c7cp06625b1.pdf [file c7cp06625b1.pdf]

*Supporting Information for*

***Photoelectron Spectroscopy and Density Functional Theory Studies of  
(fructose+(H<sub>2</sub>O)<sub>n</sub>)<sup>-</sup> (n = 1-5) Anionic Clusters***

*Zhen Zeng, Elliot R. Bernstein\**

Department of Chemistry, NSF ERC for Extreme Ultraviolet Science and Technology, Colorado State  
University, Fort Collins, CO 80523, USA

**AUTHOR INFORMATION**

**Corresponding Author**

\*Elliot R. Bernstein, E-mail: [erb@lamar.colostate.edu](mailto:erb@lamar.colostate.edu).

More low lying isomers of  $(\text{fructose}+(\text{H}_2\text{O})_n)^-$ ,  $n = 1-5$  anions, as well as their corresponding neutrals, are summarized in Figures S4, S6 to S9 as well as Figures S11 to S15 in the Supporting Information. Note that the figure numbers in the S.I. document are related to those of the text figures, as for example Figure S4  $\leftrightarrow$  Figure 4.

|                             |                                                                                     |                                                                                     |                                                                                      |                                                                                       |                                                                                       |
|-----------------------------|-------------------------------------------------------------------------------------|-------------------------------------------------------------------------------------|--------------------------------------------------------------------------------------|---------------------------------------------------------------------------------------|---------------------------------------------------------------------------------------|
| Optimized Anionic structure | 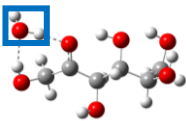   |    |    |    |    |
| Structural Polymorphism     | Open chain (A)<br>+(1)(2) $\text{H}_2\text{O}$                                      | Open chain (A)<br>+(2) $\text{H}_2\text{O}$                                         | Open chain (A)<br>+(3) $\text{H}_2\text{O}$                                          | Open chain (A)<br>+(4)(6) $\text{H}_2\text{O}$                                        | Open chain (B)<br>+(1)(2) $\text{H}_2\text{O}$                                        |
| $\Delta E$ (eV)             | 0.00                                                                                | 0.06                                                                                | 0.13                                                                                 | 0.24                                                                                  | 0.34                                                                                  |
| VDE (eV)                    | <b>2.24</b>                                                                         | <b>2.36</b>                                                                         | <b>2.17</b>                                                                          | <b>1.99</b>                                                                           | <b>1.98</b>                                                                           |
| Optimized Anionic structure |    |    |    |    |    |
| Structural Polymorphism     | Open chain (C)<br>+(1)(2) $\text{H}_2\text{O}$                                      | Open chain (C)<br>+(3)(5) $\text{H}_2\text{O}$                                      | Open chain (C)<br>+(5)(6) $\text{H}_2\text{O}$                                       | Open chain (B)<br>+(5)(6) $\text{H}_2\text{O}$                                        | $\beta$ -pyranose ( ${}^2\text{C}_5$ -chair)<br>+(1)(3) $\text{H}_2\text{O}$          |
| $\Delta E$ (eV)             | 0.34                                                                                | 0.44                                                                                | 0.45                                                                                 | 0.55                                                                                  | 0.79                                                                                  |
| VDE (eV)                    | <b>1.86</b>                                                                         | <b>1.76</b>                                                                         | <b>1.83</b>                                                                          | <b>1.76</b>                                                                           | <b>0.40</b>                                                                           |
| Optimized Anionic structure |  |  |  |  |  |
| Structural Polymorphism     | $\alpha$ -furanose ( $\text{C}_4$ -endo)<br>+(3)(4) $\text{H}_2\text{O}$            | $\beta$ -pyranose ( ${}^2\text{C}_5$ -chair)<br>+(3)(4) $\text{H}_2\text{O}$        | $\beta$ -pyranose ( ${}^2\text{C}_5$ -chair)<br>+(1)(2) $\text{H}_2\text{O}$         | $\beta$ -pyranose ( ${}^2\text{C}_5$ -chair)<br>+(4)(5) $\text{H}_2\text{O}$          | $\beta$ -pyranose ( ${}^2\text{C}_5$ -chair)<br>+(1)(3) $\text{H}_2\text{O}$          |
| $\Delta E$ (eV)             | 0.92                                                                                | 0.97                                                                                | 0.97                                                                                 | 0.97                                                                                  | 1.01                                                                                  |
| VDE (eV)                    | <b>0.47</b>                                                                         | <b>0.34</b>                                                                         | <b>0.40</b>                                                                          | <b>0.31</b>                                                                           | <b>0.45</b>                                                                           |
| Optimized Anionic structure |  |  |                                                                                      |                                                                                       |                                                                                       |
| Structural Polymorphism     | $\alpha$ -furanose ( $\text{C}_4$ -endo)<br>+(1)(3) $\text{H}_2\text{O}$            | $\alpha$ -furanose ( $\text{C}_4$ -endo)<br>+(1)(2) $\text{H}_2\text{O}$            |                                                                                      |                                                                                       |                                                                                       |
| $\Delta E$ (eV)             | 1.17                                                                                | 1.20                                                                                |                                                                                      |                                                                                       |                                                                                       |
| VDE (eV)                    | <b>0.31</b>                                                                         | <b>0.21</b>                                                                         |                                                                                      |                                                                                       |                                                                                       |

Figure S4 Optimized geometries of the typical low lying anionic isomers of  $(\text{fructose}+\text{H}_2\text{O})^-$  based on B3LYP/6-311++G(d,p) calculations. The relative energies and structural polymorphs are indicated. The blue squares indicate addition of  $\text{H}_2\text{O}$  units at the marked position. The C ordering is the same as that of fructose $^-$  parent anions. For open chain structures (1)C to (6)C is ordered from left to right. For both furanose and pyranose structures (1)C to (6)C is ordered from right to left in a clockwise direction.

|                             |                                                                                     |                                                                                     |                                                                                                            |                                                                                                               |                                                                                                        |
|-----------------------------|-------------------------------------------------------------------------------------|-------------------------------------------------------------------------------------|------------------------------------------------------------------------------------------------------------|---------------------------------------------------------------------------------------------------------------|--------------------------------------------------------------------------------------------------------|
| Optimized Anionic structure | 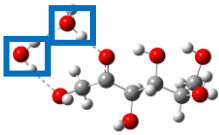   |    |                          |                            |                     |
| Structural Polymorphism     | open chain (A)<br>+(1)(intra)H <sub>2</sub> O+(2)<br>(intra)H <sub>2</sub> O        | open chain (A)<br>+(1)(2)H <sub>2</sub> O+(2)<br>H <sub>2</sub> O                   | open chain (A)<br>+(1)(2)H <sub>2</sub> O+(2)(in<br>tra)H <sub>2</sub> O                                   | open chain (A)<br>+(1)(2)H <sub>2</sub> O+(1)(3)H<br><sub>2</sub> O                                           | open chain (A)<br>+(1)(2)H <sub>2</sub> O+(1)(3)<br>)H <sub>2</sub> O                                  |
| ΔE                          | 0.00                                                                                | 0.00                                                                                | 0.01                                                                                                       | 0.01                                                                                                          | 0.02                                                                                                   |
| VDE                         | <b>2.76</b>                                                                         | <b>2.49</b>                                                                         | <b>2.54</b>                                                                                                | <b>2.48</b>                                                                                                   | <b>2.14</b>                                                                                            |
| Optimized Anionic structure |    |    |                          |                            |                     |
| Structural Polymorphism     | open chain (A)<br>+(1)(2)H <sub>2</sub> O+(intra<br>)H <sub>2</sub> O               | open chain (A)<br>+(1)(2)H <sub>2</sub> O+(4)(<br>5)(6)H <sub>2</sub> O             | open chain (A)<br>+(3)H <sub>2</sub> O+(4)(5)(6)<br>H <sub>2</sub> O                                       | open chain (A)<br>+(4)(6)H <sub>2</sub> O+(2)(intr<br>a)H <sub>2</sub> O                                      | open chain (A)<br>+(4)(6)H <sub>2</sub> O+(4)(in<br>tra)H <sub>2</sub> O                               |
| ΔE                          | 0.02                                                                                | 0.08                                                                                | 0.19                                                                                                       | 0.24                                                                                                          | 0.28                                                                                                   |
| VDE                         | <b>2.59</b>                                                                         | <b>2.36</b>                                                                         | <b>2.47</b>                                                                                                | <b>2.42</b>                                                                                                   | <b>2.31</b>                                                                                            |
| Optimized Anionic structure |    |    |                          |                            |                     |
| Structural Polymorphism     | open chain (B)<br>+(1)(2)H <sub>2</sub> O+(1)(3<br>)H <sub>2</sub> O                | open chain (B)<br>+(1)(2)H <sub>2</sub> O+(2)(i<br>ntra)H <sub>2</sub> O            | open chain (C)<br>+(1)(2)H <sub>2</sub> O+(2)(in<br>tra)H <sub>2</sub> O                                   | open chain (A)<br>+(3)H <sub>2</sub> O+(intra)H <sub>2</sub><br>O                                             | open chain (C)<br>+(1)(2)H <sub>2</sub> O+(1)(2<br>)H <sub>2</sub> O                                   |
| ΔE                          | 0.32                                                                                | 0.33                                                                                | 0.35                                                                                                       | 0.35                                                                                                          | 0.36                                                                                                   |
| VDE                         | <b>1.97</b>                                                                         | <b>2.27</b>                                                                         | <b>2.24</b>                                                                                                | <b>2.33</b>                                                                                                   | <b>2.39</b>                                                                                            |
| Optimized Anionic structure |  |  |                        |                          |                   |
| Structural Polymorphism     | open chain (C)<br>+(3)(5)H <sub>2</sub> O+(1)(2<br>)H <sub>2</sub> O                | open chain (B)<br>+(1)(2)H <sub>2</sub> O+(2)(i<br>ntra)H <sub>2</sub> O            | open chain (C)<br>+(1)(2)H <sub>2</sub> O+(5)(6)<br>H <sub>2</sub> O                                       | open chain (C)<br>+(1)(2)H <sub>2</sub> O+(1)(3)H<br><sub>2</sub> O                                           | open chain (C)<br>+(3)(5)H <sub>2</sub> O+(4)(5<br>)H <sub>2</sub> O                                   |
| ΔE                          | 0.36                                                                                | 0.37                                                                                | 0.38                                                                                                       | 0.38                                                                                                          | 0.42                                                                                                   |
| VDE                         | <b>2.12</b>                                                                         | <b>2.39</b>                                                                         | <b>2.23</b>                                                                                                | <b>1.80</b>                                                                                                   | <b>2.10</b>                                                                                            |
| Optimized Anionic structure |  |  |                        |                          |                   |
| Structural Polymorphism     | open chain (B)<br>+(1)(2)H <sub>2</sub> O+(5)(6<br>)H <sub>2</sub> O                | open chain (C)<br>+(3)(5)H <sub>2</sub> O+(6)H<br><sub>2</sub> O                    | β-pyranose ( <sup>2</sup> C <sub>5</sub> -<br>chair)<br>+(1)(3)H <sub>2</sub> O+(3)(4)<br>H <sub>2</sub> O | β-pyranose ( <sup>2</sup> C <sub>5</sub> -<br>chair)<br>+(1)(3)H <sub>2</sub> O+(1)(2)(<br>3)H <sub>2</sub> O | β-pyranose ( <sup>2</sup> C <sub>5</sub> -<br>chair)<br>+(3)(4)H <sub>2</sub> O+(3)H <sub>2</sub><br>O |
| ΔE                          | 0.47                                                                                | 0.64                                                                                | 0.79                                                                                                       | 0.82                                                                                                          | 0.82                                                                                                   |
| VDE                         | <b>2.03</b>                                                                         | <b>1.93</b>                                                                         | <b>0.61</b>                                                                                                | <b>0.58</b>                                                                                                   | <b>0.73</b>                                                                                            |

|                             |                                                                                             |                                                                                            |                                                                                             |                                                                                                     |                                                                                             |
|-----------------------------|---------------------------------------------------------------------------------------------|--------------------------------------------------------------------------------------------|---------------------------------------------------------------------------------------------|-----------------------------------------------------------------------------------------------------|---------------------------------------------------------------------------------------------|
| Optimized Anionic structure |            |           |           |                  |          |
| Structural Polymorphism     | $\beta$ -pyranose ( ${}^2C_5$ -chair)<br>+(1)(3)H <sub>2</sub> O+(intra)H <sub>2</sub> O    | $\beta$ -pyranose ( ${}^2C_5$ -chair)<br>+(4)(5)H <sub>2</sub> O+(4)H <sub>2</sub> O       | $\beta$ -pyranose ( ${}^2C_5$ -chair)<br>+(1)(3)H <sub>2</sub> O+(4)(5)H <sub>2</sub> O     | $\alpha$ -furanose (C <sub>4</sub> -endo)<br>+(3)(intra)H <sub>2</sub> O+(4)(intra)H <sub>2</sub> O | $\beta$ -pyranose ( ${}^2C_5$ -chair)<br>+(2)(3)H <sub>2</sub> O+(1)(intra)H <sub>2</sub> O |
| $\Delta E$                  | 0.83                                                                                        | 0.88                                                                                       | 0.89                                                                                        | 0.97                                                                                                | 0.97                                                                                        |
| <b>VDE</b>                  | <b>0.53</b>                                                                                 | <b>0.58</b>                                                                                | <b>0.60</b>                                                                                 | <b>0.77</b>                                                                                         | 0.63                                                                                        |
| Optimized Anionic structure |            |           |           |                  |          |
| Structural Polymorphism     | $\alpha$ -furanose (C <sub>4</sub> -endo)<br>+(3)(4)H <sub>2</sub> O+(1)(3)H <sub>2</sub> O | $\beta$ -pyranose ( ${}^2C_5$ -chair)<br>+(1)(2)(3)H <sub>2</sub> O+(3)(4)H <sub>2</sub> O | $\alpha$ -furanose (C <sub>4</sub> -endo)<br>+(1)(2)H <sub>2</sub> O+(3)(4)H <sub>2</sub> O | $\alpha$ -furanose (C <sub>4</sub> -endo) + (1)(3)H <sub>2</sub> O + (intra)H <sub>2</sub> O        | $\beta$ -pyranose ( ${}^2C_5$ -chair)<br>+(1)(2)(3)H <sub>2</sub> O+(4)(5)H <sub>2</sub> O  |
| $\Delta E$                  | 0.97                                                                                        | 1.00                                                                                       | 1.02                                                                                        | 1.06                                                                                                | 1.07                                                                                        |
| <b>VDE</b>                  | <b>0.60</b>                                                                                 | <b>0.64</b>                                                                                | <b>0.50</b>                                                                                 | <b>0.70</b>                                                                                         | <b>0.54</b>                                                                                 |
| Optimized Anionic structure |           |                                                                                            |                                                                                             |                                                                                                     |                                                                                             |
| Structural Polymorphism     | $\alpha$ -furanose (C <sub>4</sub> -endo)<br>+(1)(2)H <sub>2</sub> O+(1)(3)H <sub>2</sub> O |                                                                                            |                                                                                             |                                                                                                     |                                                                                             |
| $\Delta E$                  | 1.29                                                                                        |                                                                                            |                                                                                             |                                                                                                     |                                                                                             |
| <b>VDE</b>                  | <b>0.35</b>                                                                                 |                                                                                            |                                                                                             |                                                                                                     |                                                                                             |

Figure S6 Optimized geometries of the typical low lying anionic isomers of (fructose+(H<sub>2</sub>O)<sub>2</sub>)<sup>-</sup> based on B3LYP/6-311++G(d,p) calculations. The relative energies and structural polymorphs are indicated. The blue squares indicate addition of H<sub>2</sub>O units at the marked position. The C ordering is the same as that of fructose<sup>-</sup> parent anions. For open chain structures (1)C to (6)C is ordered from left to right. For both furanose and pyranose structures (1)C to (6)C is ordered from right to left in a clockwise direction.



|                             |                                                                                                 |                                                                                                      |                                                                                                    |                                                                                                       |                                                                                                          |
|-----------------------------|-------------------------------------------------------------------------------------------------|------------------------------------------------------------------------------------------------------|----------------------------------------------------------------------------------------------------|-------------------------------------------------------------------------------------------------------|----------------------------------------------------------------------------------------------------------|
| Optimized Anionic structure | 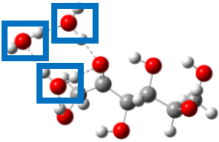               |                     |                  |                    |                       |
| Structural Polymorphism     | open chain<br>(A)+(1)(2)H <sub>2</sub> O+(2)(intra)H <sub>2</sub> O+(intra)H <sub>2</sub> O     | open chain<br>(A)+(1)(2)H <sub>2</sub> O+(2)(intra)H <sub>2</sub> O+(intra)H <sub>2</sub> O          | open chain<br>(A)+(1)(2)H <sub>2</sub> O+(1)(3)H <sub>2</sub> O+(intra)H <sub>2</sub> O            | open chain<br>(A)+(1)(intra)H <sub>2</sub> O+(2)(intra)H <sub>2</sub> O+(intra)H <sub>2</sub> O       | open chain<br>(A)+(1)(2)H <sub>2</sub> O+(2)(intra)H <sub>2</sub> O+(intra)H <sub>2</sub> O              |
| ΔE                          | 0.00                                                                                            | 0.03                                                                                                 | 0.05                                                                                               | 0.08                                                                                                  | 0.08                                                                                                     |
| VDE                         | 2.64                                                                                            | 2.94                                                                                                 | 2.39                                                                                               | 3.00                                                                                                  | 3.00                                                                                                     |
| Optimized Anionic structure |                |                     |                  |                    |                       |
| Structural Polymorphism     | open chain<br>(A)+(1)(2)H <sub>2</sub> O+(1)(3)H <sub>2</sub> O+(2)(intra)H <sub>2</sub> O      | open chain<br>(A)+(1)(2)H <sub>2</sub> O+(2)(intra)H <sub>2</sub> O+(4)(5)(6)H <sub>2</sub> O        | open chain<br>(A)+(1)(2)H <sub>2</sub> O+(1)(3)H <sub>2</sub> O+(4)(5)H <sub>2</sub> O             | open chain<br>(A)+(1)(intra)H <sub>2</sub> O+(2)(intra)H <sub>2</sub> O+(intra)H <sub>2</sub> O       | open chain<br>(A)+(1)(2)H <sub>2</sub> O+(1)(3)H <sub>2</sub> O+(4)(5)(6)H <sub>2</sub> O                |
| ΔE                          | 0.09                                                                                            | 0.11                                                                                                 | 0.13                                                                                               | 0.13                                                                                                  | 0.13                                                                                                     |
| VDE                         | 2.86                                                                                            | 2.75                                                                                                 | 2.41                                                                                               | 3.09                                                                                                  | 2.75                                                                                                     |
| Optimized Anionic structure |              |                   |                |                  |                     |
| Structural Polymorphism     | open chain<br>(A)+(1)(intra)H <sub>2</sub> O+(2)(intra)H <sub>2</sub> O+(4)(5)H <sub>2</sub> O  | open chain<br>(A)+(4)(5)(6)H <sub>2</sub> O+(4)(6)(intra)H <sub>2</sub> O+(2)(intra)H <sub>2</sub> O | open chain<br>(A)+(4)(5)(6)H <sub>2</sub> O+(6)(intra)H <sub>2</sub> O+(2)(intra)H <sub>2</sub> O  | open chain<br>(A)+(4)(6)(intra)H <sub>2</sub> O+(2)(intra)H <sub>2</sub> O+(1)(intra)H <sub>2</sub> O | open chain<br>(A)+(4)(6)(intra)H <sub>2</sub> O+(4)(intra)H <sub>2</sub> O+(intra)H <sub>2</sub> O       |
| ΔE                          | 0.17                                                                                            | 0.21                                                                                                 | 0.23                                                                                               | 0.26                                                                                                  | 0.32                                                                                                     |
| VDE                         | 3.08                                                                                            | 2.84                                                                                                 | 2.64                                                                                               | 2.78                                                                                                  | 2.40                                                                                                     |
| Optimized Anionic structure |              |                   |                |                  |                     |
| Structural Polymorphism     | open chain<br>(A)+(1)(intra)H <sub>2</sub> O+(3)(intra)H <sub>2</sub> O+(intra)H <sub>2</sub> O | open chain<br>(A)+(4)(5)(6)(intra)H <sub>2</sub> O+(3)H <sub>2</sub> O+(intra)H <sub>2</sub> O       | open chain<br>(C)+(1)(2)(intra)H <sub>2</sub> O+(2)(intra)H <sub>2</sub> O+(intra)H <sub>2</sub> O | open chain<br>(B)+(1)(2)(intra)H <sub>2</sub> O+(2)(intra)H <sub>2</sub> O+(intra)H <sub>2</sub> O    | open chain<br>(B)+(1)(2)(intra)H <sub>2</sub> O+(1)(intra)H <sub>2</sub> O+(2)(3)(intra)H <sub>2</sub> O |
| ΔE                          | 0.36                                                                                            | 0.36                                                                                                 | 0.36                                                                                               | 0.37                                                                                                  | 0.38                                                                                                     |
| VDE                         | 2.43                                                                                            | 2.70                                                                                                 | 2.40                                                                                               | 2.51                                                                                                  | 2.32                                                                                                     |

|                             |                                                                                                                                            |                                                                                                                                                 |                                                                                                                                          |                                                                                                                                                   |                                                                                                                                                     |
|-----------------------------|--------------------------------------------------------------------------------------------------------------------------------------------|-------------------------------------------------------------------------------------------------------------------------------------------------|------------------------------------------------------------------------------------------------------------------------------------------|---------------------------------------------------------------------------------------------------------------------------------------------------|-----------------------------------------------------------------------------------------------------------------------------------------------------|
| Optimized Anionic structure | 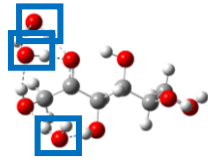                                                          |                                                                |                                                        |                                                                |                                                                  |
| Structural Polymorphism     | open chain<br>(B)+(1)(2)(intra)<br>H <sub>2</sub> O+(2)(intra)H<br><sub>2</sub> O+(1)(3)H <sub>2</sub> O                                   | open chain<br>(C)+(1)(2)(intra)H<br><sub>2</sub> O+(2)(intra)H <sub>2</sub> O+(<br>intra)H <sub>2</sub> O                                       | open chain<br>(C)+(1)(2)(intra)H <sub>2</sub><br>O+(2)(intra)H <sub>2</sub> O+(3<br>) (5)H <sub>2</sub> O                                | open chain<br>(C)+(1)(2)(intra)H<br><sub>2</sub> O+(2)(intra)H <sub>2</sub> O+(<br>1)(3)H <sub>2</sub> O                                          | open chain<br>(B)+(1)(2)H <sub>2</sub> O+(1<br>) (2)H <sub>2</sub> O+(3)(intra<br>)H <sub>2</sub> O                                                 |
| ΔE                          | 0.38                                                                                                                                       | 0.38                                                                                                                                            | 0.39                                                                                                                                     | 0.41                                                                                                                                              | 0.42                                                                                                                                                |
| VDE                         | <b>2.36</b>                                                                                                                                | <b>2.36</b>                                                                                                                                     | <b>2.51</b>                                                                                                                              | <b>2.58</b>                                                                                                                                       | <b>2.18</b>                                                                                                                                         |
| Optimized Anionic structure |                                                           |                                                                |                                                        |                                                                |                                                                  |
| Structural Polymorphism     | open chain<br>(C)+(1)(2)H <sub>2</sub> O+(<br>3)(5)H <sub>2</sub> O+(4)(5)<br>H <sub>2</sub> O                                             | open chain<br>(C)+(1)(2)(intra)H<br><sub>2</sub> O+(2)(intra)H <sub>2</sub> O+(<br>5)(6)H <sub>2</sub> O                                        | open chain<br>(B)+(1)(2)(intra)H <sub>2</sub><br>O+(2)(intra)H <sub>2</sub> O+(1<br>) (intra)H <sub>2</sub> O                            | open chain<br>(C)+(1)(2)(intra)H<br><sub>2</sub> O+(1)(2)(intra)H <sub>2</sub><br>O+(intra)H <sub>2</sub> O                                       | open chain<br>(A)+(4)(5)(6)H <sub>2</sub> O<br>+(3)(intra)H <sub>2</sub> O+(i<br>ntra)H <sub>2</sub> O                                              |
| ΔE                          | 0.42                                                                                                                                       | 0.44                                                                                                                                            | 0.45                                                                                                                                     | 0.45                                                                                                                                              | 0.49                                                                                                                                                |
| VDE                         | <b>2.38</b>                                                                                                                                | <b>2.48</b>                                                                                                                                     | <b>2.56</b>                                                                                                                              | <b>2.63</b>                                                                                                                                       | <b>2.65</b>                                                                                                                                         |
| Optimized Anionic structure |                                                         |                                                               |                                                       |                                                              |                                                                 |
| Structural Polymorphism     | open chain<br>(B)+(1)(2)H <sub>2</sub> O+(<br>1)(3)H <sub>2</sub> O+(5)(6)<br>H <sub>2</sub> O                                             | open chain<br>(C)+(1)(2)H <sub>2</sub> O+(5<br>) (6)(intra)H <sub>2</sub> O+(in<br>tra)H <sub>2</sub> O                                         | open chain<br>(B)+(1)(2)(intra)H <sub>2</sub><br>O+(2)(intra)H <sub>2</sub> O+(5<br>) (6)H <sub>2</sub> O                                | open chain<br>(B)+(1)(2)H <sub>2</sub> O+(5<br>) (6)(intra)H <sub>2</sub> O+(in<br>tra)H <sub>2</sub> O                                           | β-pyranose ( <sup>2</sup> C <sub>5</sub> -<br>chair) +<br>+(1)(3)H <sub>2</sub> O+(2)(3<br>) (intra)H <sub>2</sub> O+(1)(i<br>ntra)H <sub>2</sub> O |
| ΔE                          | 0.52                                                                                                                                       | 0.52                                                                                                                                            | 0.53                                                                                                                                     | 0.72                                                                                                                                              | 0.73                                                                                                                                                |
| VDE                         | <b>2.02</b>                                                                                                                                | <b>2.38</b>                                                                                                                                     | <b>2.34</b>                                                                                                                              | <b>2.14</b>                                                                                                                                       | <b>0.87</b>                                                                                                                                         |
| Optimized Anionic structure |                                                         |                                                              |                                                      |                                                              |                                                                |
| Structural Polymorphism     | β-pyranose ( <sup>2</sup> C <sub>5</sub> -<br>chair) +<br>+(3)(4)H <sub>2</sub> O+(1)(<br>3)H <sub>2</sub> O+(1)(2)(3)<br>H <sub>2</sub> O | β-pyranose ( <sup>2</sup> C <sub>5</sub> -<br>chair) +<br>+(3)(4)(intra)H <sub>2</sub> O<br>+(3)(intra)H <sub>2</sub> O+(1<br>)H <sub>2</sub> O | β-pyranose ( <sup>2</sup> C <sub>5</sub> -<br>chair) +<br>+(3)(4)H <sub>2</sub> O+(4)(intr<br>a)H <sub>2</sub> O+(intra)H <sub>2</sub> O | β-pyranose ( <sup>2</sup> C <sub>5</sub> -<br>chair) +<br>+(1)(2)(3)(intra)H <sub>2</sub><br>O+(1)(3)H <sub>2</sub> O+(intr<br>a)H <sub>2</sub> O | β-pyranose ( <sup>2</sup> C <sub>5</sub> -<br>chair) +<br>+(3)(4)H <sub>2</sub> O+(4)(i<br>ntra)H <sub>2</sub> O+(5)(intr<br>a)H <sub>2</sub> O     |
| ΔE                          | 0.79                                                                                                                                       | 0.82                                                                                                                                            | 0.82                                                                                                                                     | 0.84                                                                                                                                              | 0.85                                                                                                                                                |
| VDE                         | <b>0.87</b>                                                                                                                                | <b>1.10</b>                                                                                                                                     | <b>1.25</b>                                                                                                                              | <b>0.86</b>                                                                                                                                       | <b>0.84</b>                                                                                                                                         |

|                             |                                                                                                                           |                                                                                                                                 |                                                                                                                              |                                                                                                                              |                                                                                                                          |
|-----------------------------|---------------------------------------------------------------------------------------------------------------------------|---------------------------------------------------------------------------------------------------------------------------------|------------------------------------------------------------------------------------------------------------------------------|------------------------------------------------------------------------------------------------------------------------------|--------------------------------------------------------------------------------------------------------------------------|
| Optimized Anionic structure | 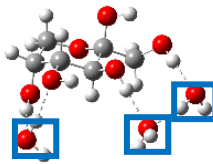                                         |                                                |                                            |                                           |                                       |
| Structural Polymorphism     | $\beta$ -pyranose ( ${}^2C_5$ -chair) + (1)(intra)H <sub>2</sub> O+(3)(intra)H <sub>2</sub> O+(4)(5)H <sub>2</sub> O      | $\beta$ -pyranose ( ${}^2C_5$ -chair) + (1)(2)(3)H <sub>2</sub> O+(1)(3)H <sub>2</sub> O+(4)(5)H <sub>2</sub> O                 | $\beta$ -pyranose ( ${}^2C_5$ -chair) + (3)(4)H <sub>2</sub> O+(1)(3)H <sub>2</sub> O+(4)(intra)H <sub>2</sub> O             | $\beta$ -pyranose ( ${}^2C_5$ -chair) + (3)(4)H <sub>2</sub> O+(1)(3)H <sub>2</sub> O+(4)(5)H <sub>2</sub> O                 | $\beta$ -pyranose ( ${}^2C_5$ -chair) + (4)(5)(intra)H <sub>2</sub> O+(1)(3)H <sub>2</sub> O+(5)(intra)H <sub>2</sub> O  |
| $\Delta E$                  | 0.85                                                                                                                      | 0.85                                                                                                                            | 0.87                                                                                                                         | 0.89                                                                                                                         | 0.95                                                                                                                     |
| <b>VDE</b>                  | <b>0.89</b>                                                                                                               | <b>0.84</b>                                                                                                                     | <b>0.82</b>                                                                                                                  | <b>0.65</b>                                                                                                                  | <b>0.94</b>                                                                                                              |
| Optimized Anionic structure |                                          |                                                |                                            |                                           |                                       |
| Structural Polymorphism     | $\alpha$ -furanose (C <sub>4</sub> -endo) + (3)(intra)H <sub>2</sub> O+(4)(intra)H <sub>2</sub> O+(intra)H <sub>2</sub> O | $\alpha$ -furanose (C <sub>4</sub> -endo) + (3)(intra)H <sub>2</sub> O+(4)(intra)H <sub>2</sub> O+(1)(2)H <sub>2</sub> O        | $\alpha$ -furanose (C <sub>4</sub> -endo) + (1)(3)(intra)H <sub>2</sub> O+(3)(intra)H <sub>2</sub> O+(intra)H <sub>2</sub> O | $\alpha$ -furanose (C <sub>4</sub> -endo) + (3)(intra)H <sub>2</sub> O+(3)(intra)H <sub>2</sub> O+(4)(intra)H <sub>2</sub> O | $\alpha$ -furanose (C <sub>4</sub> -endo) + (1)(3)(intra)H <sub>2</sub> O+(intra)H <sub>2</sub> O+(3)(4)H <sub>2</sub> O |
| $\Delta E$                  | 0.96                                                                                                                      | 0.97                                                                                                                            | 0.97                                                                                                                         | 1.01                                                                                                                         | 1.06                                                                                                                     |
| <b>VDE</b>                  | <b>1.23</b>                                                                                                               | <b>0.98</b>                                                                                                                     | <b>1.07</b>                                                                                                                  | <b>0.97</b>                                                                                                                  | <b>0.86</b>                                                                                                              |
| Optimized Anionic structure |                                        |                                              |                                                                                                                              |                                                                                                                              |                                                                                                                          |
| Structural Polymorphism     | $\alpha$ -furanose (C <sub>4</sub> -endo) + (1)(2)H <sub>2</sub> O+(1)(3)H <sub>2</sub> O+(3)(4)H <sub>2</sub> O          | $\alpha$ -furanose (C <sub>4</sub> -endo) + (1)(2)(intra)H <sub>2</sub> O+(2)(intra)H <sub>2</sub> O+(3)(intra)H <sub>2</sub> O |                                                                                                                              |                                                                                                                              |                                                                                                                          |
| $\Delta E$                  | 1.07                                                                                                                      | 1.17                                                                                                                            |                                                                                                                              |                                                                                                                              |                                                                                                                          |
| <b>VDE</b>                  | <b>0.64</b>                                                                                                               | <b>0.78</b>                                                                                                                     |                                                                                                                              |                                                                                                                              |                                                                                                                          |

Figure S7 Optimized geometries of the typical low lying anionic isomers of (fructose+(H<sub>2</sub>O)<sub>3</sub>)<sup>-</sup> based on B3LYP/6-31++G(d) calculations. The relative energies and structural polymorphs are indicated. The blue squares indicate addition of H<sub>2</sub>O units at the marked position. The C ordering is the same as that of fructose<sup>-</sup> parent anions. For open chain structures (1)C to (6)C is ordered from left to right. For both furanose and pyranose structures (1)C to (6)C is ordered from right to left in a clockwise direction.

|                             |                                                                                                                                          |                                                                                                                                    |                                                                                                                                          |                                                                                                                                 |                                                                                                                                          |
|-----------------------------|------------------------------------------------------------------------------------------------------------------------------------------|------------------------------------------------------------------------------------------------------------------------------------|------------------------------------------------------------------------------------------------------------------------------------------|---------------------------------------------------------------------------------------------------------------------------------|------------------------------------------------------------------------------------------------------------------------------------------|
| Optimized Anionic structure |                                                                                                                                          |                                                                                                                                    |                                                                                                                                          |                                                                                                                                 |                                                                                                                                          |
| Structural Polymorphism     | open chain (A) + (1)(2)(intra)H <sub>2</sub> O + (2)(3)(intra)H <sub>2</sub> O + (1)(3)(intra)H <sub>2</sub> O + (intra)H <sub>2</sub> O | open chain (A) + (1)(2)(intra)H <sub>2</sub> O + (1)(intra)H <sub>2</sub> O + (2)(intra)H <sub>2</sub> O + (intra)H <sub>2</sub> O | open chain (A) + (1)(2)(intra)H <sub>2</sub> O + (1)H <sub>2</sub> O + (2)(intra)H <sub>2</sub> O + (intra)H <sub>2</sub> O              | open chain (A) + (1)(2)(intra)H <sub>2</sub> O + (2)(intra)H <sub>2</sub> O + (intra)H <sub>2</sub> O + (intra)H <sub>2</sub> O | open chain (A) + (1)(intra)H <sub>2</sub> O + (2)(intra)H <sub>2</sub> O + (2)(intra)H <sub>2</sub> O + (intra)H <sub>2</sub> O          |
| $\Delta E$                  | 0.00                                                                                                                                     | 0.12                                                                                                                               | 0.19                                                                                                                                     | 0.21                                                                                                                            | 0.21                                                                                                                                     |
| <b>VDE</b>                  | <b>2.88</b>                                                                                                                              | <b>2.74</b>                                                                                                                        | <b>2.87</b>                                                                                                                              | <b>3.18</b>                                                                                                                     | <b>3.10</b>                                                                                                                              |
| Optimized Anionic structure |                                                                                                                                          |                                                                                                                                    |                                                                                                                                          |                                                                                                                                 |                                                                                                                                          |
| Structural Polymorphism     | open chain (A) + (1)(2)(intra)H <sub>2</sub> O + (2)(intra)H <sub>2</sub> O + (intra)H <sub>2</sub> O + (4)(5)(6)H <sub>2</sub> O        | open chain (A) + (1)(2)(intra)H <sub>2</sub> O + (1)(3)(intra)H <sub>2</sub> O + (intra)H <sub>2</sub> O + (intra)H <sub>2</sub> O | open chain (A) + (1)(2)(intra)H <sub>2</sub> O + (2)(intra)H <sub>2</sub> O + (intra)H <sub>2</sub> O + (intra)H <sub>2</sub> O          | open chain (A) + (1)(2)(intra)H <sub>2</sub> O + (2)(intra)H <sub>2</sub> O + (intra)H <sub>2</sub> O + (intra)H <sub>2</sub> O | open chain (A) + (1)(2)H <sub>2</sub> O + (1)(intra)H <sub>2</sub> O + (2)(intra)H <sub>2</sub> O + (intra)H <sub>2</sub> O              |
| $\Delta E$                  | 0.21                                                                                                                                     | 0.22                                                                                                                               | 0.23                                                                                                                                     | 0.23                                                                                                                            | 0.25                                                                                                                                     |
| <b>VDE</b>                  | <b>2.86</b>                                                                                                                              | <b>2.67</b>                                                                                                                        | <b>2.83</b>                                                                                                                              | <b>3.20</b>                                                                                                                     | <b>3.14</b>                                                                                                                              |
| Optimized Anionic structure |                                                                                                                                          |                                                                                                                                    |                                                                                                                                          |                                                                                                                                 |                                                                                                                                          |
| Structural Polymorphism     | open chain (A) + (1)(2)(intra)H <sub>2</sub> O + (1)(3)(intra)H <sub>2</sub> O + (intra)H <sub>2</sub> O + (4)(5)(6)H <sub>2</sub> O     | open chain (A) + (1)(2)(intra)H <sub>2</sub> O + (1)(3)H <sub>2</sub> O + (2)(intra)H <sub>2</sub> O + (4)(5)(6)H <sub>2</sub> O   | open chain (A) + (1)(intra)H <sub>2</sub> O + (2)(intra)H <sub>2</sub> O + (2)(intra)H <sub>2</sub> O + (intra)H <sub>2</sub> O          | open chain (A) + (1)(2)H <sub>2</sub> O + (1)(3)H <sub>2</sub> O + (4)(5)(intra)H <sub>2</sub> O + (6)(intra)H <sub>2</sub> O   | open chain (A) + (1)(2)(intra)H <sub>2</sub> O + (2)(intra)H <sub>2</sub> O + (2)(intra)H <sub>2</sub> O + (intra)H <sub>2</sub> O       |
| $\Delta E$                  | 0.26                                                                                                                                     | 0.26                                                                                                                               | 0.27                                                                                                                                     | 0.27                                                                                                                            | 0.27                                                                                                                                     |
| <b>VDE</b>                  | <b>2.62</b>                                                                                                                              | <b>2.70</b>                                                                                                                        | <b>3.45</b>                                                                                                                              | <b>2.60</b>                                                                                                                     | <b>2.85</b>                                                                                                                              |
| Optimized Anionic structure |                                                                                                                                          |                                                                                                                                    |                                                                                                                                          |                                                                                                                                 |                                                                                                                                          |
| Structural Polymorphism     | open chain (A) + (1)(2)(intra)H <sub>2</sub> O + (1)(intra)H <sub>2</sub> O + (3)(intra)H <sub>2</sub> O + (intra)H <sub>2</sub> O       | open chain (A) + (1)(intra)H <sub>2</sub> O + (2)(3)(intra)H <sub>2</sub> O + (3)(intra)H <sub>2</sub> O + (intra)H <sub>2</sub> O | open chain (C) + (1)(2)(intra)H <sub>2</sub> O + (2)(3)(intra)H <sub>2</sub> O + (1)(3)(intra)H <sub>2</sub> O + (intra)H <sub>2</sub> O | open chain (A) + (1)(intra)H <sub>2</sub> O + (2)(intra)H <sub>2</sub> O + (4)(5)(6)H <sub>2</sub> O + (intra)H <sub>2</sub> O  | open chain (B) + (1)(2)(intra)H <sub>2</sub> O + (2)(3)(intra)H <sub>2</sub> O + (1)(3)(intra)H <sub>2</sub> O + (intra)H <sub>2</sub> O |
| $\Delta E$                  | 0.28                                                                                                                                     | 0.28                                                                                                                               | 0.29                                                                                                                                     | 0.30                                                                                                                            | 0.30                                                                                                                                     |

| VDE                         | 2.87                                                                                                                                 | 2.39                                                                                                                               | 2.68                                                                                                                                 | 3.25                                                                                                                                  | 2.64                                                                                                                              |
|-----------------------------|--------------------------------------------------------------------------------------------------------------------------------------|------------------------------------------------------------------------------------------------------------------------------------|--------------------------------------------------------------------------------------------------------------------------------------|---------------------------------------------------------------------------------------------------------------------------------------|-----------------------------------------------------------------------------------------------------------------------------------|
| Optimized Anionic structure | 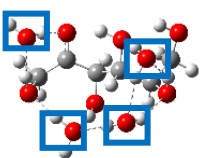                                                    |                                                   |                                                     |                                                    |                                                |
| Structural Polymorphism     | open chain (A) + (1)(2)H <sub>2</sub> O + (1)(3)(intra)H <sub>2</sub> O + (4)(5)(intra)H <sub>2</sub> O + (5)(intra)H <sub>2</sub> O | open chain (A) + (1)(2)(intra)H <sub>2</sub> O + (2)(intra)H <sub>2</sub> O + (intra)H <sub>2</sub> O + (4)(5)(6)H <sub>2</sub> O  | open chain (A) + (1)(2)(intra)H <sub>2</sub> O + (2)(intra)H <sub>2</sub> O + (1)(3)H <sub>2</sub> O + (4)(5)(6)H <sub>2</sub> O     | open chain (A) + (1)(intra)H <sub>2</sub> O + (2)(intra)H <sub>2</sub> O + (4)(5)(intra)H <sub>2</sub> O + (6)(intra)H <sub>2</sub> O | open chain (A) + (1)(intra)H <sub>2</sub> O + (2)(intra)H <sub>2</sub> O + (4)(5)H <sub>2</sub> O + (intra)H <sub>2</sub> O       |
| ΔE                          | 0.30                                                                                                                                 | 0.32                                                                                                                               | 0.32                                                                                                                                 | 0.33                                                                                                                                  | 0.34                                                                                                                              |
| VDE                         | 2.41                                                                                                                                 | 3.22                                                                                                                               | 3.09                                                                                                                                 | 3.28                                                                                                                                  | 3.29                                                                                                                              |
| Optimized Anionic structure |                                                     |                                                   |                                                     |                                                    |                                                |
| Structural Polymorphism     | open chain (A) + (1)(2)(intra)H <sub>2</sub> O + (2)(intra)H <sub>2</sub> O + (4)(5)(6)H <sub>2</sub> O + (intra)H <sub>2</sub> O    | open chain (A) + (1)(2)(intra)H <sub>2</sub> O + (2)(intra)H <sub>2</sub> O + (4)(6)H <sub>2</sub> O + (4)(5)(6)H <sub>2</sub> O   | open chain (A) + (1)(intra)H <sub>2</sub> O + (2)(intra)H <sub>2</sub> O + (4)(6)(intra)H <sub>2</sub> O + (4)(5)(6)H <sub>2</sub> O | open chain (A) + (1)(intra)H <sub>2</sub> O + (2)(intra)H <sub>2</sub> O + (1)(3)(intra)H <sub>2</sub> O + (4)(5)H <sub>2</sub> O     | open chain (A) + (2)(intra)H <sub>2</sub> O + (4)(6)(intra)H <sub>2</sub> O + (intra)H <sub>2</sub> O + (4)(5)(6)H <sub>2</sub> O |
| ΔE                          | 0.36                                                                                                                                 | 0.37                                                                                                                               | 0.38                                                                                                                                 | 0.40                                                                                                                                  | 0.41                                                                                                                              |
| VDE                         | 2.89                                                                                                                                 | 3.03                                                                                                                               | 2.91                                                                                                                                 | 2.83                                                                                                                                  | 3.09                                                                                                                              |
| Optimized Anionic structure |                                                   |                                                 |                                                   |                                                  |                                              |
| Structural Polymorphism     | open chain (A) + (1)(3)(intra)H <sub>2</sub> O + (3)(intra)H <sub>2</sub> O + (intra)H <sub>2</sub> O + (4)(5)(6)H <sub>2</sub> O    | open chain (B) + (1)(2)(intra)H <sub>2</sub> O + (1)(intra)H <sub>2</sub> O + (2)(intra)H <sub>2</sub> O + (intra)H <sub>2</sub> O | open chain (A) + (1)(intra)H <sub>2</sub> O + (3)(intra)H <sub>2</sub> O + (intra)H <sub>2</sub> O + (intra)H <sub>2</sub> O         | open chain (A) + (1)(intra)H <sub>2</sub> O + (2)(intra)H <sub>2</sub> O + (4)(6)(intra)H <sub>2</sub> O + (4)(5)H <sub>2</sub> O     | open chain (C) + (1)(2)(intra)H <sub>2</sub> O + (2)(intra)H <sub>2</sub> O + (intra)H <sub>2</sub> O + (1)(3)H <sub>2</sub> O    |
| ΔE                          | 0.44                                                                                                                                 | 0.46                                                                                                                               | 0.48                                                                                                                                 | 0.49                                                                                                                                  | 0.51                                                                                                                              |
| VDE                         | 2.24                                                                                                                                 | 2.59                                                                                                                               | 2.77                                                                                                                                 | 3.06                                                                                                                                  | 2.36                                                                                                                              |
| Optimized Anionic structure |                                                   |                                                 |                                                   |                                                  |                                              |
| Structural Polymorphism     | open chain (A) + (1)(intra)H <sub>2</sub> O + (2)(intra)H <sub>2</sub> O +                                                           | open chain (C) + (1)(intra)H <sub>2</sub> O + (2)(intra)H <sub>2</sub> O +                                                         | open chain (C) + (1)(2)(intra)H <sub>2</sub> O + (2)(intra)H <sub>2</sub> O +                                                        | open chain (C) + (1)(2)(intra)H <sub>2</sub> O + (2)(intra)H <sub>2</sub> O +                                                         | open chain (B) + (1)(2)(intra)H <sub>2</sub> O + (2)(intra)H <sub>2</sub> O +                                                     |



|                             |                                                                                                                                                                     |                                                                                                                                                                         |                                                                                                                                                                                |                                                                                                                                                                        |                                                                                                                                                                        |
|-----------------------------|---------------------------------------------------------------------------------------------------------------------------------------------------------------------|-------------------------------------------------------------------------------------------------------------------------------------------------------------------------|--------------------------------------------------------------------------------------------------------------------------------------------------------------------------------|------------------------------------------------------------------------------------------------------------------------------------------------------------------------|------------------------------------------------------------------------------------------------------------------------------------------------------------------------|
|                             | (4)(6)(intra)H <sub>2</sub> O + (intra)H <sub>2</sub> O                                                                                                             | (2)(intra)H <sub>2</sub> O + (intra)H <sub>2</sub> O                                                                                                                    | (5)(6)H <sub>2</sub> O + (intra)H <sub>2</sub> O                                                                                                                               | (3)(5)(intra)H <sub>2</sub> O + (6)(intra)H <sub>2</sub> O                                                                                                             | (intra)H <sub>2</sub> O + (intra)H <sub>2</sub> O                                                                                                                      |
| $\Delta E$                  | 0.51                                                                                                                                                                | 0.52                                                                                                                                                                    | 0.53                                                                                                                                                                           | 0.59                                                                                                                                                                   | 0.59                                                                                                                                                                   |
| <b>VDE</b>                  | <b>2.85</b>                                                                                                                                                         | <b>2.27</b>                                                                                                                                                             | <b>2.61</b>                                                                                                                                                                    | <b>2.69</b>                                                                                                                                                            | <b>2.84</b>                                                                                                                                                            |
| Optimized Anionic structure | 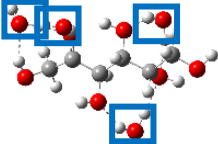                                                                                   |                                                                                        |                                                                                               |                                                                                     |                                                                                     |
| Structural Polymorphism     | open chain (C) + (1)(2)(intra)H <sub>2</sub> O + (2)(intra)H <sub>2</sub> O + (3)(5)H <sub>2</sub> O + (4)(6)H <sub>2</sub> O                                       | open chain (A) + (3)H <sub>2</sub> O + (4)(5)(6)H <sub>2</sub> O + (intra)H <sub>2</sub> O + (intra)H <sub>2</sub> O                                                    | open chain (C) + (1)(2)(intra)H <sub>2</sub> O + (2)(intra)H <sub>2</sub> O + (intra)H <sub>2</sub> O + (intra)H <sub>2</sub> O                                                | open chain (A) + (3)H <sub>2</sub> O + (4)(5)(6)H <sub>2</sub> O + (intra)H <sub>2</sub> O + (intra)H <sub>2</sub> O                                                   | open chain (B) + (1)(2)(intra)H <sub>2</sub> O + (2)(intra)H <sub>2</sub> O + (intra)H <sub>2</sub> O + (5)(6)H <sub>2</sub> O                                         |
| $\Delta E$                  | 0.60                                                                                                                                                                | 0.60                                                                                                                                                                    | 0.61                                                                                                                                                                           | 0.61                                                                                                                                                                   | 0.65                                                                                                                                                                   |
| <b>VDE</b>                  | <b>2.78</b>                                                                                                                                                         | <b>2.83</b>                                                                                                                                                             | <b>2.57</b>                                                                                                                                                                    | <b>2.88</b>                                                                                                                                                            | <b>2.55</b>                                                                                                                                                            |
| Optimized Anionic structure |                                                                                    |                                                                                        |                                                                                               |                                                                                     |                                                                                     |
| Structural Polymorphism     | open chain (C) + (1)(2)H <sub>2</sub> O + (3)(5)H <sub>2</sub> O + (5)(6)(intra)H <sub>2</sub> O + (4)(intra)H <sub>2</sub> O                                       | open chain (B) + (1)(2)(intra)H <sub>2</sub> O + (1)(intra)H <sub>2</sub> O + (2)(3)(intra)H <sub>2</sub> O + (5)(6)H <sub>2</sub> O                                    | $\beta$ -pyranose ( <sup>2</sup> C <sub>5</sub> -chair) + (1)(3)(intra)H <sub>2</sub> O + (2)(3)(intra)H <sub>2</sub> O + (1)(intra)H <sub>2</sub> O + (intra)H <sub>2</sub> O | $\beta$ -pyranose ( <sup>2</sup> C <sub>5</sub> -chair) + (3)(4)H <sub>2</sub> O + (2)(3)(intra)H <sub>2</sub> O + (1)(3)H <sub>2</sub> O + (1)(intra)H <sub>2</sub> O | $\beta$ -pyranose ( <sup>2</sup> C <sub>5</sub> -chair) + (1)(2)(3)H <sub>2</sub> O + (1)(intra)H <sub>2</sub> O + (3)(intra)H <sub>2</sub> O + (3)(4)H <sub>2</sub> O |
| $\Delta E$                  | 0.66                                                                                                                                                                | 0.66                                                                                                                                                                    | 0.87                                                                                                                                                                           | 0.96                                                                                                                                                                   | 0.98                                                                                                                                                                   |
| <b>VDE</b>                  | <b>2.41</b>                                                                                                                                                         | <b>2.36</b>                                                                                                                                                             | <b>0.92</b>                                                                                                                                                                    | <b>1.07</b>                                                                                                                                                            | <b>1.08</b>                                                                                                                                                            |
| Optimized Anionic structure |                                                                                  |                                                                                      |                                                                                             |                                                                                   |                                                                                   |
| Structural Polymorphism     | $\beta$ -pyranose ( <sup>2</sup> C <sub>5</sub> -chair) + (1)(3)H <sub>2</sub> O + (3)(4)(intra)H <sub>2</sub> O + (4)(5)H <sub>2</sub> O + (intra)H <sub>2</sub> O | $\beta$ -pyranose ( <sup>2</sup> C <sub>5</sub> -chair) + (1)(intra)H <sub>2</sub> O + (2)(3)(intra)H <sub>2</sub> O + (1)(3)H <sub>2</sub> O + (intra)H <sub>2</sub> O | $\beta$ -pyranose ( <sup>2</sup> C <sub>5</sub> -chair) + (1)(2)H <sub>2</sub> O + (1)(3)H <sub>2</sub> O + (3)(4)H <sub>2</sub> O + (4)(5)H <sub>2</sub> O                    | $\beta$ -pyranose ( <sup>2</sup> C <sub>5</sub> -chair) + (1)(intra)H <sub>2</sub> O + (2)(3)(intra)H <sub>2</sub> O + (1)(3)H <sub>2</sub> O + (4)(5)H <sub>2</sub> O | $\alpha$ -furanose (C <sub>4</sub> -endo) + (3)(intra)H <sub>2</sub> O + (4)(intra)H <sub>2</sub> O + (6)(intra)H <sub>2</sub> O + (intra)H <sub>2</sub> O             |
| $\Delta E$                  | 0.99                                                                                                                                                                | 1.00                                                                                                                                                                    | 1.03                                                                                                                                                                           | 1.05                                                                                                                                                                   | 1.05                                                                                                                                                                   |
| <b>VDE</b>                  | <b>1.18</b>                                                                                                                                                         | <b>1.03</b>                                                                                                                                                             | <b>1.00</b>                                                                                                                                                                    | <b>0.87</b>                                                                                                                                                            | <b>1.45</b>                                                                                                                                                            |

|                             |                                                                                                                |                                                                                                                   |                                                                                                                |                                                                                                                  |                                                                                                                |
|-----------------------------|----------------------------------------------------------------------------------------------------------------|-------------------------------------------------------------------------------------------------------------------|----------------------------------------------------------------------------------------------------------------|------------------------------------------------------------------------------------------------------------------|----------------------------------------------------------------------------------------------------------------|
| Optimized Anionic structure | 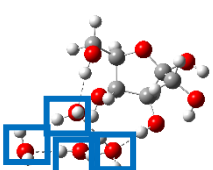                              |                                  |                               |                               |                             |
| Structural Polymorphism     | $\alpha$ -furanose ( $C_4$ -endo) + (3)(intra) $H_2O$ + (4)(intra) $H_2O$ + (6)(intra) $H_2O$ + (intra) $H_2O$ | $\beta$ -pyranose ( ${}^2C_5$ -chair) + (1)(2)(3) $H_2O$ + (1)(3) $H_2O$ + (intra) $H_2O$ + (intra) $H_2O$        | $\alpha$ -furanose ( $C_4$ -endo) + (1)(3) $H_2O$ + (3)(intra) $H_2O$ + (intra) $H_2O$ + (4)(6) $H_2O$         | $\alpha$ -furanose ( $C_4$ -endo) + (1)(2)(intra) $H_2O$ + (2)(intra) $H_2O$ + (3)(intra) $H_2O$ + (3)(4) $H_2O$ | $\beta$ -pyranose ( ${}^2C_5$ -chair) + (1)(3) $H_2O$ + (3)(4) $H_2O$ + (4)(5) $H_2O$ + (intra) $H_2O$         |
| $\Delta E$                  | 1.07                                                                                                           | 1.07                                                                                                              | 1.07                                                                                                           | 1.11                                                                                                             | 1.15                                                                                                           |
| VDE                         | <b>1.35</b>                                                                                                    | <b>1.28</b>                                                                                                       | <b>1.37</b>                                                                                                    | <b>0.98</b>                                                                                                      | <b>0.86</b>                                                                                                    |
| Optimized Anionic structure |                               |                                  |                               |                               |                             |
| WStructural Polymorphism    | $\alpha$ -furanose ( $C_4$ -endo) + (1)(3) $H_2O$ + (3)(intra) $H_2O$ + (4)(intra) $H_2O$ + (intra) $H_2O$     | $\alpha$ -furanose ( $C_4$ -endo) + (1)(3)(intra) $H_2O$ + (1)(intra) $H_2O$ + (3)(intra) $H_2O$ + (intra) $H_2O$ | $\alpha$ -furanose ( $C_4$ -endo) + (3)(intra) $H_2O$ + (3)(intra) $H_2O$ + (4)(intra) $H_2O$ + (intra) $H_2O$ | $\alpha$ -furanose ( $C_4$ -endo) + (1)(3)(intra) $H_2O$ + (3)(intra) $H_2O$ + (intra) $H_2O$ + (intra) $H_2O$   | $\alpha$ -furanose ( $C_4$ -endo) + (1)(intra) $H_2O$ + (2)(intra) $H_2O$ + (3)(intra) $H_2O$ + (intra) $H_2O$ |
| $\Delta E$                  | 1.20                                                                                                           | 1.22                                                                                                              | 1.22                                                                                                           | 1.22                                                                                                             | 1.45                                                                                                           |
| VDE                         | <b>1.23</b>                                                                                                    | <b>1.16</b>                                                                                                       | <b>1.08</b>                                                                                                    | <b>1.23</b>                                                                                                      | <b>0.98</b>                                                                                                    |

Figure S8 Optimized geometries of the typical low lying anionic isomers of  $(\text{fructose} + (\text{H}_2\text{O})_4)^-$  based on B3LYP/6-31++G(d) calculations. The relative energies and structural polymorphs are indicated. The blue squares indicate addition of  $\text{H}_2\text{O}$  units at the marked position. The C ordering is the same as that of fructose $^-$  parent anions. For open chain structures (1)C to (6)C is ordered from left to right. For both furanose and pyranose structures (1)C to (6)C is ordered from right to left in a clockwise direction.

|                             |                                                                                                                                                              |                                                                                                                                                                    |                                                                                                                                                                 |                                                                                                                                                                      |                                                                                                                                                                       |
|-----------------------------|--------------------------------------------------------------------------------------------------------------------------------------------------------------|--------------------------------------------------------------------------------------------------------------------------------------------------------------------|-----------------------------------------------------------------------------------------------------------------------------------------------------------------|----------------------------------------------------------------------------------------------------------------------------------------------------------------------|-----------------------------------------------------------------------------------------------------------------------------------------------------------------------|
| Optimized Anionic structure |                                                                                                                                                              |                                                                                                                                                                    |                                                                                                                                                                 |                                                                                                                                                                      |                                                                                                                                                                       |
| Structural Polymorphism     | open chain (A) + (1)(2)(intra)H <sub>2</sub> O + (2)(intra)H <sub>2</sub> O + (3)(intra)H <sub>2</sub> O + (intra)H <sub>2</sub> O + (intra)H <sub>2</sub> O | open chain (A) + (1)(2)(intra)H <sub>2</sub> O + (2)(3)(intra)H <sub>2</sub> O + (1)(3)(intra)H <sub>2</sub> O + (intra)H <sub>2</sub> O + (intra)H <sub>2</sub> O | open chain (A) + (1)(2)(intra)H <sub>2</sub> O + (2)(3)(intra)H <sub>2</sub> O + (1)(3)(intra)H <sub>2</sub> O + (intra)H <sub>2</sub> O + (2)H <sub>2</sub> O  | open chain (A) + (1)(2)(intra)H <sub>2</sub> O + (2)(3)(intra)H <sub>2</sub> O + (1)(3)(intra)H <sub>2</sub> O + (intra)H <sub>2</sub> O + (4)(5)(6)H <sub>2</sub> O | open chain (A) + (1)(2)(intra)H <sub>2</sub> O + (2)(3)(intra)H <sub>2</sub> O + (1)(3)(intra)H <sub>2</sub> O + (intra)H <sub>2</sub> O + (3)(intra)H <sub>2</sub> O |
| $\Delta E$                  | 0.00                                                                                                                                                         | 0.06                                                                                                                                                               | 0.08                                                                                                                                                            | 0.10                                                                                                                                                                 | 0.10                                                                                                                                                                  |
| VDE                         | 2.97                                                                                                                                                         | 3.09                                                                                                                                                               | 3.22                                                                                                                                                            | 3.12                                                                                                                                                                 | 3.14                                                                                                                                                                  |
| Optimized Anionic structure |                                                                                                                                                              |                                                                                                                                                                    |                                                                                                                                                                 |                                                                                                                                                                      |                                                                                                                                                                       |
| Structural Polymorphism     | open chain (A) + (1)(2)(intra)H <sub>2</sub> O + (1)(intra)H <sub>2</sub> O + (2)(intra)H <sub>2</sub> O + (intra)H <sub>2</sub> O + (intra)H <sub>2</sub> O | open chain (A) + (1)(2)(intra)H <sub>2</sub> O + (1)(intra)H <sub>2</sub> O + (2)(intra)H <sub>2</sub> O + (intra)H <sub>2</sub> O + (1)(3)H <sub>2</sub> O        | open chain (A) + (1)(intra)H <sub>2</sub> O + (2)(intra)H <sub>2</sub> O + (1)(2)(intra)H <sub>2</sub> O + (intra)H <sub>2</sub> O + (intra)H <sub>2</sub> O    | open chain (A) + (1)(intra)H <sub>2</sub> O + (2)(intra)H <sub>2</sub> O + (1)(2)(3)H <sub>2</sub> O + (intra)H <sub>2</sub> O + (intra)H <sub>2</sub> O             | open chain (A) + (1)(intra)H <sub>2</sub> O + (2)(intra)H <sub>2</sub> O + (1)(2)(intra)H <sub>2</sub> O + (intra)H <sub>2</sub> O + (4)(5)(6)H <sub>2</sub> O        |
| $\Delta E$                  | 0.15                                                                                                                                                         | 0.15                                                                                                                                                               | 0.17                                                                                                                                                            | 0.18                                                                                                                                                                 | 0.20                                                                                                                                                                  |
| VDE                         | 2.77                                                                                                                                                         | 3.16                                                                                                                                                               | 2.93                                                                                                                                                            | 3.17                                                                                                                                                                 | 2.95                                                                                                                                                                  |
| Optimized Anionic structure |                                                                                                                                                              |                                                                                                                                                                    |                                                                                                                                                                 |                                                                                                                                                                      |                                                                                                                                                                       |
| Structural Polymorphism     | open chain (A) + (1)(intra)H <sub>2</sub> O + (2)(intra)H <sub>2</sub> O + (1)(2)(intra)H <sub>2</sub> O + (intra)H <sub>2</sub> O + (intra)H <sub>2</sub> O | open chain (A) + (1)(2)(intra)H <sub>2</sub> O + (1)(intra)H <sub>2</sub> O + (2)(intra)H <sub>2</sub> O + (intra)H <sub>2</sub> O + (intra)H <sub>2</sub> O       | open chain (A) + (1)(2)(intra)H <sub>2</sub> O + (1)(intra)H <sub>2</sub> O + (2)(intra)H <sub>2</sub> O + (3)(intra)H <sub>2</sub> O + (intra)H <sub>2</sub> O | open chain (A) + (1)(2)(intra)H <sub>2</sub> O + (3)(intra)H <sub>2</sub> O + (5)(intra)H <sub>2</sub> O + (4)(intra)H <sub>2</sub> O + (intra)H <sub>2</sub> O      | open chain (A) + (1)(2)(intra)H <sub>2</sub> O + (2)(intra)H <sub>2</sub> O + (intra)H <sub>2</sub> O + (intra)H <sub>2</sub> O                                       |
| $\Delta E$                  | 0.20                                                                                                                                                         | 0.21                                                                                                                                                               | 0.23                                                                                                                                                            | 0.23                                                                                                                                                                 | 0.23                                                                                                                                                                  |
| VDE                         | 3.44                                                                                                                                                         | 3.61                                                                                                                                                               | 3.11                                                                                                                                                            | 2.63                                                                                                                                                                 | 3.44                                                                                                                                                                  |
| Optimized Anionic structure |                                                                                                                                                              |                                                                                                                                                                    |                                                                                                                                                                 |                                                                                                                                                                      |                                                                                                                                                                       |
| Structural Polymorphism     | open chain (A) + (1)(2)(intra)H <sub>2</sub> O +                                                                                                             | open chain (A) + (1)(2)(intra)H <sub>2</sub> O +                                                                                                                   | open chain (A) + (1)(2)(intra)H <sub>2</sub> O +                                                                                                                | open chain (A) +                                                                                                                                                     | open chain (A) + (1)(intra)H <sub>2</sub> O +                                                                                                                         |



|                                   |                                                                                                                                                                             |                                                                                                                                                                               |                                                                                                                                                                             |                                                                                                                                                                          |                                                                                                                                                                             |
|-----------------------------------|-----------------------------------------------------------------------------------------------------------------------------------------------------------------------------|-------------------------------------------------------------------------------------------------------------------------------------------------------------------------------|-----------------------------------------------------------------------------------------------------------------------------------------------------------------------------|--------------------------------------------------------------------------------------------------------------------------------------------------------------------------|-----------------------------------------------------------------------------------------------------------------------------------------------------------------------------|
|                                   | (1)(intra)H <sub>2</sub> O +<br>(2)(intra)H <sub>2</sub> O +<br>(2)H <sub>2</sub> O +<br>(intra)H <sub>2</sub> O                                                            | (1)(intra)H <sub>2</sub> O +<br>(2)(intra)H <sub>2</sub> O +<br>(2)(intra)H <sub>2</sub> O +<br>(intra)H <sub>2</sub> O                                                       | (2)(intra)H <sub>2</sub> O +<br>(intra)H <sub>2</sub> O +<br>(1)(3)H <sub>2</sub> O +<br>(4)(5)(6)H <sub>2</sub> O                                                          | (1)(2)(intra)H <sub>2</sub> O<br>+<br>(1)(3)(intra)H <sub>2</sub> O<br>+ (intra)H <sub>2</sub> O +<br>(intra)H <sub>2</sub> O +<br>(intra)H <sub>2</sub> O               | (2)(intra)H <sub>2</sub> O +<br>(1)(2)(3)H <sub>2</sub> O +<br>(intra)H <sub>2</sub> O +<br>(intra)H <sub>2</sub> O                                                         |
| $\Delta E$                        | 0.25                                                                                                                                                                        | 0.25                                                                                                                                                                          | 0.26                                                                                                                                                                        | 0.26                                                                                                                                                                     | 0.26                                                                                                                                                                        |
| <b>VDE</b>                        | <b>2.93</b>                                                                                                                                                                 | <b>3.03</b>                                                                                                                                                                   | <b>2.80</b>                                                                                                                                                                 | <b>2.67</b>                                                                                                                                                              | <b>2.94</b>                                                                                                                                                                 |
| Optimized<br>Anionic<br>structure | 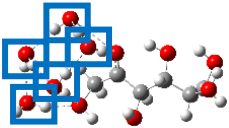                                                                                           |                                                                                              |                                                                                           |                                                                                       |                                                                                          |
| Structural<br>Polymorphism        | open chain (A) +<br>(1)(intra)H <sub>2</sub> O +<br>(2)(intra)H <sub>2</sub> O +<br>(2)(intra)H <sub>2</sub> O +<br>(intra)H <sub>2</sub> O +<br>(intra)H <sub>2</sub> O    | open chain (A) +<br>(1)(2)(intra)H <sub>2</sub> O +<br>(1)H <sub>2</sub> O +<br>(2)(intra)H <sub>2</sub> O +<br>(intra)H <sub>2</sub> O +<br>(4)(5)(6)H <sub>2</sub> O        | open chain (A) +<br>(1)(intra)H <sub>2</sub> O +<br>(2)(intra)H <sub>2</sub> O +<br>(2)(intra)H <sub>2</sub> O +<br>(4)(intra)H <sub>2</sub> O +<br>(intra)H <sub>2</sub> O | open chain (A)<br>+ (1)(intra)H <sub>2</sub> O<br>+ (2)(intra)H <sub>2</sub> O<br>+ (2)(intra)H <sub>2</sub> O<br>+ (intra)H <sub>2</sub> O +<br>(intra)H <sub>2</sub> O | open chain (A) +<br>(1)(intra)H <sub>2</sub> O +<br>(2)(intra)H <sub>2</sub> O +<br>(4)(intra)H <sub>2</sub> O +<br>(intra)H <sub>2</sub> O +<br>(intra)H <sub>2</sub> O    |
| $\Delta E$                        | 0.27                                                                                                                                                                        | 0.27                                                                                                                                                                          | 0.29                                                                                                                                                                        | 0.29                                                                                                                                                                     | 0.30                                                                                                                                                                        |
| <b>VDE</b>                        | <b>3.06</b>                                                                                                                                                                 | <b>3.07</b>                                                                                                                                                                   | <b>3.32</b>                                                                                                                                                                 | <b>3.60</b>                                                                                                                                                              | <b>3.14</b>                                                                                                                                                                 |
| Optimized<br>Anionic<br>structure |                                                                                           |                                                                                             |                                                                                          |                                                                                      |                                                                                         |
| Structural<br>Polymorphism        | open chain (A) +<br>(1)(2)(intra)H <sub>2</sub> O +<br>(2)(intra)H <sub>2</sub> O +<br>(4)(intra)H <sub>2</sub> O +<br>(intra)H <sub>2</sub> O +<br>(intra)H <sub>2</sub> O | open chain (A) +<br>(1)(2)(intra)H <sub>2</sub> O +<br>(2)(intra)H <sub>2</sub> O<br>+ (intra)H <sub>2</sub> O +<br>(intra)H <sub>2</sub> O +<br>(4)(5)(6)H <sub>2</sub> O    | open chain (A) +<br>(1)(2)(intra)H <sub>2</sub> O +<br>(2)(intra)H <sub>2</sub> O +<br>(intra)H <sub>2</sub> O +<br>(4)(5)(6)H <sub>2</sub> O +<br>(intra)H <sub>2</sub> O  | open chain (A)<br>+ (1)(intra)H <sub>2</sub> O<br>+ (2)(intra)H <sub>2</sub> O<br>+ (2)(intra)H <sub>2</sub> O<br>+ (intra)H <sub>2</sub> O +<br>(intra)H <sub>2</sub> O | open chain (A) +<br>(1)(intra)H <sub>2</sub> O +<br>(1)(intra)H <sub>2</sub> O +<br>(2)(3)(intra)H <sub>2</sub> O<br>+ (intra)H <sub>2</sub> O +<br>(intra)H <sub>2</sub> O |
| $\Delta E$                        | 0.31                                                                                                                                                                        | 0.31                                                                                                                                                                          | 0.32                                                                                                                                                                        | 0.32                                                                                                                                                                     | 0.32                                                                                                                                                                        |
| <b>VDE</b>                        | <b>2.98</b>                                                                                                                                                                 | <b>3.24</b>                                                                                                                                                                   | <b>2.98</b>                                                                                                                                                                 | <b>3.26</b>                                                                                                                                                              | <b>2.58</b>                                                                                                                                                                 |
| Optimized<br>Anionic<br>structure |                                                                                          |                                                                                            |                                                                                         |                                                                                     |                                                                                        |
| Structural<br>Polymorphism        | open chain (A) +<br>(1)(2)(intra)H <sub>2</sub> O +<br>(2)(intra)H <sub>2</sub> O +<br>(intra)H <sub>2</sub> O +<br>(4)(5)(6)H <sub>2</sub> O +<br>(4)(6)H <sub>2</sub> O   | open chain (A) +<br>(1)(2)H <sub>2</sub> O +<br>(1)(intra)H <sub>2</sub> O +<br>(3)(intra)H <sub>2</sub> O +<br>(4)(5)(intra)H <sub>2</sub> O +<br>(6)(intra)H <sub>2</sub> O | open chain (A) +<br>(1)(2)(intra)H <sub>2</sub> O +<br>(1)H <sub>2</sub> O +<br>(2)(intra)H <sub>2</sub> O +<br>(intra)H <sub>2</sub> O +<br>(intra)H <sub>2</sub> O        | open chain (A)<br>+ (1)(intra)H <sub>2</sub> O<br>+ (2)(intra)H <sub>2</sub> O<br>+ (2)(intra)H <sub>2</sub> O<br>+ (intra)H <sub>2</sub> O +<br>(4)(5)H <sub>2</sub> O  | open chain (A) +<br>(1)(2)(intra)H <sub>2</sub> O<br>+ (2)(intra)H <sub>2</sub> O +<br>(4)(intra)H <sub>2</sub> O +<br>(intra)H <sub>2</sub> O +<br>(intra)H <sub>2</sub> O |
| $\Delta E$                        | 0.32                                                                                                                                                                        | 0.33                                                                                                                                                                          | 0.33                                                                                                                                                                        | 0.33                                                                                                                                                                     | 0.33                                                                                                                                                                        |
| <b>VDE</b>                        | <b>3.15</b>                                                                                                                                                                 | <b>2.78</b>                                                                                                                                                                   | <b>3.09</b>                                                                                                                                                                 | <b>3.36</b>                                                                                                                                                              | <b>3.35</b>                                                                                                                                                                 |

|                             |                                                                                                                                                             |                                                                                                                                                                    |                                                                                                                                                                    |                                                                                                                                                                       |                                                                                                                                                                       |
|-----------------------------|-------------------------------------------------------------------------------------------------------------------------------------------------------------|--------------------------------------------------------------------------------------------------------------------------------------------------------------------|--------------------------------------------------------------------------------------------------------------------------------------------------------------------|-----------------------------------------------------------------------------------------------------------------------------------------------------------------------|-----------------------------------------------------------------------------------------------------------------------------------------------------------------------|
| Optimized Anionic structure |                                                                                                                                                             |                                                                                                                                                                    |                                                                                                                                                                    |                                                                                                                                                                       |                                                                                                                                                                       |
| Structural Polymorphism     | open chain (A) + (1)(2)H <sub>2</sub> O + (2)(intra)H <sub>2</sub> O + (intra)H <sub>2</sub> O + (1)(3)H <sub>2</sub> O + (4)(5)(6)H <sub>2</sub> O         | open chain (C) + (1)(2)(intra)H <sub>2</sub> O + (2)(3)(intra)H <sub>2</sub> O + (1)(3)(intra)H <sub>2</sub> O + (intra)H <sub>2</sub> O + (intra)H <sub>2</sub> O | open chain (B) + (1)(2)(intra)H <sub>2</sub> O + (2)(3)(intra)H <sub>2</sub> O + (1)(3)(intra)H <sub>2</sub> O + (intra)H <sub>2</sub> O + (intra)H <sub>2</sub> O | open chain (B) + (1)(2)(intra)H <sub>2</sub> O + (2)(3)(intra)H <sub>2</sub> O + (1)(3)(intra)H <sub>2</sub> O + (intra)H <sub>2</sub> O + (intra)H <sub>2</sub> O    | open chain (A) + (1)(2)H <sub>2</sub> O + (1)(3)H <sub>2</sub> O + (4)(intra)H <sub>2</sub> O + (5)(6)(intra)H <sub>2</sub> O + (intra)H <sub>2</sub> O               |
| $\Delta E$                  | 0.33                                                                                                                                                        | 0.34                                                                                                                                                               | 0.34                                                                                                                                                               | 0.35                                                                                                                                                                  | 0.35                                                                                                                                                                  |
| VDE                         | <b>2.97</b>                                                                                                                                                 | <b>2.91</b>                                                                                                                                                        | <b>2.85</b>                                                                                                                                                        | <b>2.86</b>                                                                                                                                                           | <b>2.72</b>                                                                                                                                                           |
| Optimized Anionic structure |                                                                                                                                                             |                                                                                                                                                                    |                                                                                                                                                                    |                                                                                                                                                                       |                                                                                                                                                                       |
| Structural Polymorphism     | open chain (A) + (1)(2)H <sub>2</sub> O + (1)(3)H <sub>2</sub> O + (2)(intra)H <sub>2</sub> O + (4)(5)(intra)H <sub>2</sub> O + (6)(intra)H <sub>2</sub> O  | open chain (A) + (1)(2)(intra)H <sub>2</sub> O + (2)(intra)H <sub>2</sub> O + (intra)H <sub>2</sub> O + (intra)H <sub>2</sub> O + (intra)H <sub>2</sub> O          | open chain (B) + (1)(2)(intra)H <sub>2</sub> O + (1)(3)(intra)H <sub>2</sub> O + (2)(3)(intra)H <sub>2</sub> O + (intra)H <sub>2</sub> O + (2)H <sub>2</sub> O     | open chain (A) + (1)(intra)H <sub>2</sub> O + (2)(intra)H <sub>2</sub> O + (intra)H <sub>2</sub> O + (4)(5)(intra)H <sub>2</sub> O + (6)(intra)H <sub>2</sub> O       | open chain (C) + (1)(2)(intra)H <sub>2</sub> O + (2)(3)(intra)H <sub>2</sub> O + (1)(3)(intra)H <sub>2</sub> O + (intra)H <sub>2</sub> O + (3)(intra)H <sub>2</sub> O |
| $\Delta E$                  | 0.35                                                                                                                                                        | 0.36                                                                                                                                                               | 0.37                                                                                                                                                               | 0.37                                                                                                                                                                  | 0.37                                                                                                                                                                  |
| VDE                         | <b>2.97</b>                                                                                                                                                 | <b>3.50</b>                                                                                                                                                        | <b>2.99</b>                                                                                                                                                        | <b>3.48</b>                                                                                                                                                           | <b>2.94</b>                                                                                                                                                           |
| Optimized Anionic structure |                                                                                                                                                             |                                                                                                                                                                    |                                                                                                                                                                    |                                                                                                                                                                       |                                                                                                                                                                       |
| Structural Polymorphism     | open chain (A) + (1)(intra)H <sub>2</sub> O + (2)(intra)H <sub>2</sub> O + (2)(intra)H <sub>2</sub> O + (intra)H <sub>2</sub> O + (4)(5)(6)H <sub>2</sub> O | open chain (A) + (1)(intra)H <sub>2</sub> O + (2)(intra)H <sub>2</sub> O + (1)(2)(3)H <sub>2</sub> O + (intra)H <sub>2</sub> O + (4)(5)H <sub>2</sub> O            | open chain (A) + (1)(intra)H <sub>2</sub> O + (2)(3)(intra)H <sub>2</sub> O + (intra)H <sub>2</sub> O + (intra)H <sub>2</sub> O + (4)(5)H <sub>2</sub> O           | open chain (B) + (1)(2)(intra)H <sub>2</sub> O + (1)(3)(intra)H <sub>2</sub> O + (2)(3)(intra)H <sub>2</sub> O + (intra)H <sub>2</sub> O + (3)(intra)H <sub>2</sub> O | open chain (A) + (1)(intra)H <sub>2</sub> O + (2)(intra)H <sub>2</sub> O + (1)(3)H <sub>2</sub> O + (4)(5)(intra)H <sub>2</sub> O + (6)(intra)H <sub>2</sub> O        |
| $\Delta E$                  | 0.38                                                                                                                                                        | 0.38                                                                                                                                                               | 0.38                                                                                                                                                               | 0.39                                                                                                                                                                  | 0.40                                                                                                                                                                  |
| VDE                         | <b>3.67</b>                                                                                                                                                 | <b>3.38</b>                                                                                                                                                        | <b>2.67</b>                                                                                                                                                        | <b>2.91</b>                                                                                                                                                           | <b>2.99</b>                                                                                                                                                           |

|                             |                                                                                                                                                                          |                                                                                                                                                                    |                                                                                                                                                                   |                                                                                                                                                                    |                                                                                                                                                                       |
|-----------------------------|--------------------------------------------------------------------------------------------------------------------------------------------------------------------------|--------------------------------------------------------------------------------------------------------------------------------------------------------------------|-------------------------------------------------------------------------------------------------------------------------------------------------------------------|--------------------------------------------------------------------------------------------------------------------------------------------------------------------|-----------------------------------------------------------------------------------------------------------------------------------------------------------------------|
| Optimized Anionic structure | 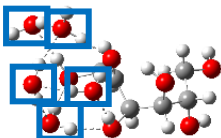                                                                                        |                                                                                   |                                                                                 |                                                                                 |                                                                                    |
| Structural Polymorphism     | open chain (C) + (1)(intra)H <sub>2</sub> O + (2)(intra)H <sub>2</sub> O + (2)(3)(intra)H <sub>2</sub> O + (1)(3)(intra)H <sub>2</sub> O + (intra)H <sub>2</sub> O       | open chain (A) + (1)(intra)H <sub>2</sub> O + (2)(intra)H <sub>2</sub> O + (4)(5)(intra)H <sub>2</sub> O + (5)(6)(intra)H <sub>2</sub> O + (intra)H <sub>2</sub> O | open chain (A) + (1)(3)(intra)H <sub>2</sub> O + (1)(intra)H <sub>2</sub> O + (3)(intra)H <sub>2</sub> O + (intra)H <sub>2</sub> O + (4)(5)(6)H <sub>2</sub> O    | open chain (A) + (2)(intra)H <sub>2</sub> O + (4)(6)(intra)H <sub>2</sub> O + (4)(5)(6)(intra)H <sub>2</sub> O + (intra)H <sub>2</sub> O + (intra)H <sub>2</sub> O | open chain (A) + (1)(intra)H <sub>2</sub> O + (2)(intra)H <sub>2</sub> O + (4)(6)(intra)H <sub>2</sub> O + (4)(5)(6)(intra)H <sub>2</sub> O + (intra)H <sub>2</sub> O |
| $\Delta E$                  | 0.39                                                                                                                                                                     | 0.40                                                                                                                                                               | 0.42                                                                                                                                                              | 0.43                                                                                                                                                               | 0.44                                                                                                                                                                  |
| VDE                         | 2.71                                                                                                                                                                     | 3.50                                                                                                                                                               | 2.44                                                                                                                                                              | 3.21                                                                                                                                                               | 3.14                                                                                                                                                                  |
| Optimized Anionic structure |                                                                                         |                                                                                   |                                                                                 |                                                                                 |                                                                                    |
| Structural Polymorphism     | open chain (A) + (1)(2)(intra)H <sub>2</sub> O + (2)(intra)H <sub>2</sub> O + (4)(5)(6)(intra)H <sub>2</sub> O + (4)(6)(intra)H <sub>2</sub> O + (intra)H <sub>2</sub> O | open chain (A) + (1)(intra)H <sub>2</sub> O + (2)(3)(intra)H <sub>2</sub> O + (intra)H <sub>2</sub> O + (intra)H <sub>2</sub> O + (intra)H <sub>2</sub> O          | open chain (B) + (1)(2)(intra)H <sub>2</sub> O + (1)(3)(intra)H <sub>2</sub> O + (2)(3)(intra)H <sub>2</sub> O + (intra)H <sub>2</sub> O + (5)(6)H <sub>2</sub> O | open chain (B) + (1)(2)(intra)H <sub>2</sub> O + (1)(intra)H <sub>2</sub> O + (2)(intra)H <sub>2</sub> O + (intra)H <sub>2</sub> O + (intra)H <sub>2</sub> O       | open chain (C) + (1)(2)(intra)H <sub>2</sub> O + (2)(intra)H <sub>2</sub> O + (4)(intra)H <sub>2</sub> O + (intra)H <sub>2</sub> O + (1)(3)H <sub>2</sub> O           |
| $\Delta E$                  | 0.45                                                                                                                                                                     | 0.46                                                                                                                                                               | 0.48                                                                                                                                                              | 0.51                                                                                                                                                               | 0.52                                                                                                                                                                  |
| VDE                         | 3.22                                                                                                                                                                     | 2.66                                                                                                                                                               | 2.68                                                                                                                                                              | 2.76                                                                                                                                                               | 2.72                                                                                                                                                                  |
| Optimized Anionic structure |                                                                                       |                                                                                 |                                                                               |                                                                               |                                                                                  |
| Structural Polymorphism     | open chain (B) + (1)(2)(intra)H <sub>2</sub> O + (1)(3)H <sub>2</sub> O + (1)(intra)H <sub>2</sub> O + (2)(intra)H <sub>2</sub> O + (intra)H <sub>2</sub> O              | open chain (A) + (1)(3)(intra)H <sub>2</sub> O + (3)(intra)H <sub>2</sub> O + (intra)H <sub>2</sub> O + (4)(5)(6)(intra)H <sub>2</sub> O + (intra)H <sub>2</sub> O | open chain (C) + (1)(2)(intra)H <sub>2</sub> O + (1)(intra)H <sub>2</sub> O + (2)(intra)H <sub>2</sub> O + (intra)H <sub>2</sub> O + (1)(3)H <sub>2</sub> O       | open chain (C) + (1)(intra)H <sub>2</sub> O + (2)(intra)H <sub>2</sub> O + (2)(intra)H <sub>2</sub> O + (intra)H <sub>2</sub> O + (1)(3)H <sub>2</sub> O           | open chain (C) + (1)(intra)H <sub>2</sub> O + (2)(intra)H <sub>2</sub> O + (2)(intra)H <sub>2</sub> O + (intra)H <sub>2</sub> O + (1)(3)(intra)H <sub>2</sub> O       |
| $\Delta E$                  | 0.53                                                                                                                                                                     | 0.53                                                                                                                                                               | 0.55                                                                                                                                                              | 0.55                                                                                                                                                               | 0.55                                                                                                                                                                  |
| VDE                         | 2.56                                                                                                                                                                     | 2.42                                                                                                                                                               | 2.61                                                                                                                                                              | 2.73                                                                                                                                                               | 2.45                                                                                                                                                                  |
| Optimized Anionic structure |                                                                                       |                                                                                 |                                                                               |                                                                               |                                                                                  |

|                             |                                                                                                                                                                                                   |                                                                                                                                                                                                         |                                                                                                                                                                                    |                                                                                                                                                                                                   |                                                                                                                                                                                                         |
|-----------------------------|---------------------------------------------------------------------------------------------------------------------------------------------------------------------------------------------------|---------------------------------------------------------------------------------------------------------------------------------------------------------------------------------------------------------|------------------------------------------------------------------------------------------------------------------------------------------------------------------------------------|---------------------------------------------------------------------------------------------------------------------------------------------------------------------------------------------------|---------------------------------------------------------------------------------------------------------------------------------------------------------------------------------------------------------|
| Structural Polymorphism     | open chain (A) + (1)(intra)H <sub>2</sub> O + (2)(intra)H <sub>2</sub> O + (intra)H <sub>2</sub> O + (4)(6)(intra)H <sub>2</sub> O + (4)(5)(6)H <sub>2</sub> O                                    | open chain (C) + (1)(intra)H <sub>2</sub> O + (1)(intra)H <sub>2</sub> O + (2)(intra)H <sub>2</sub> O + (2)(intra)H <sub>2</sub> O + (intra)H <sub>2</sub> O                                            | open chain (C) + (1)(2)(intra)H <sub>2</sub> O + (2)(intra)H <sub>2</sub> O + (3)(5)(intra)H <sub>2</sub> O + (6)(intra)H <sub>2</sub> O + (intra)H <sub>2</sub> O                 | open chain (C) + (1)(2)(intra)H <sub>2</sub> O + (2)(intra)H <sub>2</sub> O + (intra)H <sub>2</sub> O + (1)(3)H <sub>2</sub> O + (5)(6)H <sub>2</sub> O                                           | open chain (C) + (1)(intra)H <sub>2</sub> O + (2)(intra)H <sub>2</sub> O + (2)(intra)H <sub>2</sub> O + (intra)H <sub>2</sub> O + (5)(6)H <sub>2</sub> O                                                |
| ΔE                          | 0.56                                                                                                                                                                                              | 0.56                                                                                                                                                                                                    | 0.57                                                                                                                                                                               | 0.59                                                                                                                                                                                              | 0.61                                                                                                                                                                                                    |
| VDE                         | 3.11                                                                                                                                                                                              | 2.54                                                                                                                                                                                                    | 2.84                                                                                                                                                                               | 2.51                                                                                                                                                                                              | 2.44                                                                                                                                                                                                    |
| Optimized Anionic structure | 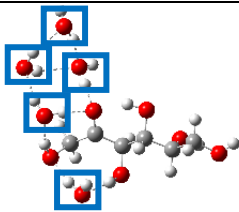                                                                                                                 |                                                                                                                        |                                                                                                  |                                                                                                                |                                                                                                                      |
| Structural Polymorphism     | open chain (C) + (1)(2)(intra)H <sub>2</sub> O + (2)(intra)H <sub>2</sub> O + (intra)H <sub>2</sub> O + (intra)H <sub>2</sub> O + (1)(3)H <sub>2</sub> O                                          | open chain (B) + (1)(2)(intra)H <sub>2</sub> O + (1)(intra)H <sub>2</sub> O + (2)(intra)H <sub>2</sub> O + (intra)H <sub>2</sub> O + (5)(6)H <sub>2</sub> O                                             | open chain (C) + (1)(2)(intra)H <sub>2</sub> O + (2)(intra)H <sub>2</sub> O + (3)(5)(intra)H <sub>2</sub> O + (6)(intra)H <sub>2</sub> O + (1)H <sub>2</sub> O                     | β-pyranose ( <sup>2</sup> C <sub>5</sub> -chair) + (1)(3)(intra)H <sub>2</sub> O + (2)(3)(intra)H <sub>2</sub> O + (1)(intra)H <sub>2</sub> O + (intra)H <sub>2</sub> O + (intra)H <sub>2</sub> O | β-pyranose ( <sup>2</sup> C <sub>5</sub> -chair) + (3)(4)H <sub>2</sub> O + (2)(3)(intra)H <sub>2</sub> O + (1)(3)(intra)(intra)H <sub>2</sub> O + (1)(intra)H <sub>2</sub> O + (intra)H <sub>2</sub> O |
| ΔE                          | 0.62                                                                                                                                                                                              | 0.64                                                                                                                                                                                                    | 0.65                                                                                                                                                                               | 0.95                                                                                                                                                                                              | 0.96                                                                                                                                                                                                    |
| VDE                         | 2.51                                                                                                                                                                                              | 2.64                                                                                                                                                                                                    | 2.94                                                                                                                                                                               | 1.09                                                                                                                                                                                              | 1.08                                                                                                                                                                                                    |
| Optimized Anionic structure |                                                                                                                |                                                                                                                      |                                                                                                |                                                                                                              |                                                                                                                    |
| Structural Polymorphism     | β-pyranose ( <sup>2</sup> C <sub>5</sub> -chair) + (2)(3)(intra)H <sub>2</sub> O + (1)(intra)H <sub>2</sub> O + (1)(3)(intra)H <sub>2</sub> O + (intra)H <sub>2</sub> O + (intra)H <sub>2</sub> O | β-pyranose ( <sup>2</sup> C <sub>5</sub> -chair) + (2)(3)(intra)H <sub>2</sub> O + (1)(intra)H <sub>2</sub> O + (1)(3)(intra)H <sub>2</sub> O + (3)(4)(intra)H <sub>2</sub> O + (intra)H <sub>2</sub> O | α-furanose (C <sub>4</sub> -endo) + (3)(intra)H <sub>2</sub> O + (4)(intra)H <sub>2</sub> O + (6)(intra)H <sub>2</sub> O + (intra)H <sub>2</sub> O + (intra)H <sub>2</sub> O       | -pyranose ( <sup>2</sup> C <sub>5</sub> -chair) + (1)(2)(3)H <sub>2</sub> O + (1)(intra)H <sub>2</sub> O + (3)(intra)H <sub>2</sub> O + (3)(4)(intra)H <sub>2</sub> O + (intra)H <sub>2</sub> O   | β-pyranose ( <sup>2</sup> C <sub>5</sub> -chair) + (2)(3)(intra)H <sub>2</sub> O + (1)(intra)H <sub>2</sub> O + (1)(3)(intra)H <sub>2</sub> O + (intra)H <sub>2</sub> O + (free)H <sub>2</sub> O        |
| ΔE                          | 0.96                                                                                                                                                                                              | 0.97                                                                                                                                                                                                    | 0.98                                                                                                                                                                               | 1.01                                                                                                                                                                                              | 1.01                                                                                                                                                                                                    |
| VDE                         | 1.04                                                                                                                                                                                              | 1.49                                                                                                                                                                                                    | 1.38                                                                                                                                                                               | 1.05                                                                                                                                                                                              | 1.39                                                                                                                                                                                                    |
| Optimized Anionic structure |                                                                                                                |                                                                                                                      |                                                                                                |                                                                                                              |                                                                                                                    |
| Structural Polymorphism     | β-pyranose ( <sup>2</sup> C <sub>5</sub> -chair) + (1)(3)(intra)H <sub>2</sub> O + (3)(4)(intra)H <sub>2</sub> O + (intra)H <sub>2</sub> O + (intra)H <sub>2</sub> O + (4)(5)H <sub>2</sub> O     | α-furanose (C <sub>4</sub> -endo) + (3)(intra)H <sub>2</sub> O + (4)(intra)H <sub>2</sub> O + (6)(intra)H <sub>2</sub> O + (intra)H <sub>2</sub> O + (intra)H <sub>2</sub> O                            | α-furanose (C <sub>4</sub> -endo) + (1)(3)(intra)H <sub>2</sub> O + (3)(intra)H <sub>2</sub> O + (4)(6)(intra)H <sub>2</sub> O + (intra)H <sub>2</sub> O + (intra)H <sub>2</sub> O | α-furanose (C <sub>4</sub> -endo) + (3)(intra)H <sub>2</sub> O + (4)(intra)H <sub>2</sub> O + (6)(intra)H <sub>2</sub> O + (intra)H <sub>2</sub> O + (intra)H <sub>2</sub> O                      | β-pyranose ( <sup>2</sup> C <sub>5</sub> -chair) + (1)(2)(3)(intra)H <sub>2</sub> O + (1)(intra)H <sub>2</sub> O + (3)(intra)H <sub>2</sub> O +                                                         |

|                             |                                                                                                                                                                                      |                                                                                                                                                                                                  |                                                                                                                                                                                          |                                                                                                                                                                                         |                                                                                                                                                                                         |
|-----------------------------|--------------------------------------------------------------------------------------------------------------------------------------------------------------------------------------|--------------------------------------------------------------------------------------------------------------------------------------------------------------------------------------------------|------------------------------------------------------------------------------------------------------------------------------------------------------------------------------------------|-----------------------------------------------------------------------------------------------------------------------------------------------------------------------------------------|-----------------------------------------------------------------------------------------------------------------------------------------------------------------------------------------|
|                             |                                                                                                                                                                                      |                                                                                                                                                                                                  |                                                                                                                                                                                          |                                                                                                                                                                                         | (intra)H <sub>2</sub> O + (3)(4)H <sub>2</sub> O                                                                                                                                        |
| $\Delta E$                  | 1.02                                                                                                                                                                                 | 1.04                                                                                                                                                                                             | 1.04                                                                                                                                                                                     | 1.04                                                                                                                                                                                    | 1.08                                                                                                                                                                                    |
| <b>VDE</b>                  | <b>1.38</b>                                                                                                                                                                          | <b>1.43</b>                                                                                                                                                                                      | <b>1.24</b>                                                                                                                                                                              | <b>1.33</b>                                                                                                                                                                             | <b>1.24</b>                                                                                                                                                                             |
| Optimized Anionic structure | 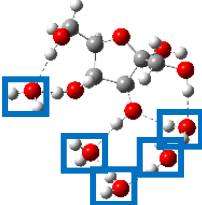                                                                                                    |                                                                                                                 |                                                                                                        |                                                                                                      |                                                                                                      |
| Structural Polymorphism     | $\alpha$ -furanose (C <sub>4</sub> -endo) + (1)(3)(intra)H <sub>2</sub> O + (3)(intra)H <sub>2</sub> O + (intra)H <sub>2</sub> O + (intra)H <sub>2</sub> O + (4)(6)H <sub>2</sub> O  | $\beta$ -pyranose ( <sup>2</sup> C <sub>5</sub> -chair) + (1)(2)(3)H <sub>2</sub> O + (1)(intra)H <sub>2</sub> O + (3)(intra)H <sub>2</sub> O + (intra)H <sub>2</sub> O + (3)(4)H <sub>2</sub> O | $\beta$ -pyranose ( <sup>2</sup> C <sub>5</sub> -chair) + (2)(3)H <sub>2</sub> O + (1)(intra)H <sub>2</sub> O + (1)(3)H <sub>2</sub> O + (3)(4)H <sub>2</sub> O + (4)(5)H <sub>2</sub> O | $\alpha$ -furanose (C <sub>4</sub> -endo) + (3)(intra)H <sub>2</sub> O + (3)(intra)H <sub>2</sub> O + (4)(intra)H <sub>2</sub> O + (6)(intra)H <sub>2</sub> O + (intra)H <sub>2</sub> O | $\alpha$ -furanose (C <sub>4</sub> -endo) + (3)(intra)H <sub>2</sub> O + (3)(intra)H <sub>2</sub> O + (4)(intra)H <sub>2</sub> O + (6)(intra)H <sub>2</sub> O + (intra)H <sub>2</sub> O |
| $\Delta E$                  | 1.11                                                                                                                                                                                 | 1.11                                                                                                                                                                                             | 1.12                                                                                                                                                                                     | 1.13                                                                                                                                                                                    | 1.15                                                                                                                                                                                    |
| <b>VDE</b>                  | <b>1.54</b>                                                                                                                                                                          | <b>1.32</b>                                                                                                                                                                                      | <b>1.06</b>                                                                                                                                                                              | <b>1.48</b>                                                                                                                                                                             | <b>1.56</b>                                                                                                                                                                             |
| Optimized Anionic structure |                                                                                                    |                                                                                                                |                                                                                                       |                                                                                                                                                                                         |                                                                                                                                                                                         |
| Structural Polymorphism     | $\alpha$ -furanose (C <sub>4</sub> -endo) + (3)(intra)H <sub>2</sub> O + (4)(intra)H <sub>2</sub> O + (6)(intra)H <sub>2</sub> O + (intra)H <sub>2</sub> O + (intra)H <sub>2</sub> O | $\alpha$ -furanose (C <sub>4</sub> -endo) + (1)(intra)H <sub>2</sub> O + (1)(3)(intra)H <sub>2</sub> O + (3)(intra)H <sub>2</sub> O + (intra)H <sub>2</sub> O + (4)(6)H <sub>2</sub> O           | $\alpha$ -furanose (C <sub>4</sub> -endo) + (1)(intra)H <sub>2</sub> O + (1)(3)(intra)H <sub>2</sub> O + (3)(intra)H <sub>2</sub> O + (intra)H <sub>2</sub> O + (4)(6)H <sub>2</sub> O   |                                                                                                                                                                                         |                                                                                                                                                                                         |
| $\Delta E$                  | 1.18                                                                                                                                                                                 | 1.18                                                                                                                                                                                             | 1.19                                                                                                                                                                                     |                                                                                                                                                                                         |                                                                                                                                                                                         |
| <b>VDE</b>                  | <b>1.64</b>                                                                                                                                                                          | <b>1.50</b>                                                                                                                                                                                      | <b>1.48</b>                                                                                                                                                                              |                                                                                                                                                                                         |                                                                                                                                                                                         |

Figure S9 Optimized geometries of the typical low lying anionic isomers of (fructose+(H<sub>2</sub>O)<sub>5</sub>)<sup>-</sup> based on B3LYP/6-31++G(d) calculations. The relative energies and structural polymorphs are indicated. The blue squares indicate addition of H<sub>2</sub>O units at the marked position. The C ordering is the same as that of fructose<sup>-</sup> parent anions. For open chain structures (1)C to (6)C is ordered from left to right. For both furanose and pyranose structures (1)C to (6)C is ordered from right to left in a clockwise direction.

|                             |                                                                                     |                                                                                   |                                                                                    |                                                                                     |                                                                                     |
|-----------------------------|-------------------------------------------------------------------------------------|-----------------------------------------------------------------------------------|------------------------------------------------------------------------------------|-------------------------------------------------------------------------------------|-------------------------------------------------------------------------------------|
| Optimized Neutral structure | 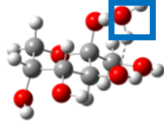   |  |  |  |  |
| Structural Polymorphism     | $\beta$ -pyranose ( ${}^2C_5$ -chair) + (2)(3)H <sub>2</sub> O                      | $\beta$ -pyranose ( ${}^2C_5$ -chair) + (3)(4)H <sub>2</sub> O                    | $\beta$ -pyranose ( ${}^2C_5$ -chair) + (4)(5)H <sub>2</sub> O                     | $\beta$ -pyranose ( ${}^2C_5$ -chair) + (1)(3)H <sub>2</sub> O                      | $\alpha$ -furanose (C <sub>4</sub> -endo) + (1)(3)H <sub>2</sub> O                  |
| $\Delta E$ (eV)             | 0.00                                                                                | 0.01                                                                              | 0.05                                                                               | 0.08                                                                                | 0.12                                                                                |
| Optimized Neutral structure |    |  |  |  |  |
| Structural Polymorphism     | Open chain (A) + (1)(2)H <sub>2</sub> O                                             | Open chain (C) + (5)(6)H <sub>2</sub> O                                           | Open chain (A) + (4)(6)H <sub>2</sub> O                                            | Open chain (A) + (1)(2)H <sub>2</sub> O                                             | Open chain (A) + (3)H <sub>2</sub> O                                                |
| $\Delta E$ (eV)             | 0.15                                                                                | 0.16                                                                              | 0.18                                                                               | 0.20                                                                                | 0.21                                                                                |
| Optimized Neutral structure |    |  |  |  |  |
| Structural Polymorphism     | $\alpha$ -furanose (C <sub>4</sub> -endo) + (1)(2)H <sub>2</sub> O                  | Open chain (B) + (5)(6)H <sub>2</sub> O                                           | Open chain (C) + (3)(5)H <sub>2</sub> O                                            | $\alpha$ -furanose (C <sub>4</sub> -endo) + (3)(4)H <sub>2</sub> O                  | Open chain (C) + (1)(2)H <sub>2</sub> O                                             |
| $\Delta E$ (eV)             | 0.22                                                                                | 0.23                                                                              | 0.24                                                                               | 0.25                                                                                | 0.25                                                                                |
| Optimized Neutral structure |  |                                                                                   |                                                                                    |                                                                                     |                                                                                     |
| Structural Polymorphism     | Open chain (B) + (1)(2)H <sub>2</sub> O                                             |                                                                                   |                                                                                    |                                                                                     |                                                                                     |
| $\Delta E$ (eV)             | 0.30                                                                                |                                                                                   |                                                                                    |                                                                                     |                                                                                     |

Figure S11 Optimized geometries of the typical low lying neutral isomers of (fructose+H<sub>2</sub>O) based on B3LYP/6-311++G(d,p) calculations. The relative energies and structural polymorphs are indicated. The blue squares indicate addition of H<sub>2</sub>O units at the marked position. The C ordering is the same as that of fructose<sup>-</sup> parent anions. For open chain structures (1)C to (6)C is ordered from left to right. For both furanose and pyranose structures (1)C to (6)C is ordered from right to left in a clockwise direction.



|                             |                                                                                                        |                                                                                            |                                                                                             |                                                                                             |                                                                                                        |
|-----------------------------|--------------------------------------------------------------------------------------------------------|--------------------------------------------------------------------------------------------|---------------------------------------------------------------------------------------------|---------------------------------------------------------------------------------------------|--------------------------------------------------------------------------------------------------------|
| Optimized Neutral structure |                                                                                                        |                                                                                            |                                                                                             |                                                                                             |                                                                                                        |
| Structural Polymorphism     | $\beta$ -pyranose ( ${}^2C_5$ -chair)<br>+(1)(3)(intra)H <sub>2</sub> O<br>+(3)(intra)H <sub>2</sub> O | open chain (A)<br>+(2)(intra)H <sub>2</sub> O+(1)(4)(intra)H <sub>2</sub> O                | open chain (B)<br>+(1)(intra)H <sub>2</sub> O+(2)(intra)H <sub>2</sub> O                    | open chain (C)<br>+(2)(intra)H <sub>2</sub> O+(1)(4)(intra)H <sub>2</sub> O                 | $\beta$ -pyranose ( ${}^2C_5$ -chair)<br>+(2)(3)(intra)H <sub>2</sub> O<br>+(1)(intra)H <sub>2</sub> O |
| $\Delta E$ (eV)             | 0.00                                                                                                   | 0.05                                                                                       | 0.06                                                                                        | 0.07                                                                                        | 0.08                                                                                                   |
| Optimized Neutral structure |                                                                                                        |                                                                                            |                                                                                             |                                                                                             |                                                                                                        |
| Structural Polymorphism     | open chain (A)<br>+(1)(intra)H <sub>2</sub> O+(2)(intra)H <sub>2</sub> O                               | $\beta$ -pyranose ( ${}^2C_5$ -chair)<br>+(4)(5)H <sub>2</sub> O+(3)(4)H <sub>2</sub> O    | $\beta$ -pyranose ( ${}^2C_5$ -chair)<br>+(1)(2)H <sub>2</sub> O+(4)(5)H <sub>2</sub> O     | open chain (A)<br>+(1)(2)H <sub>2</sub> O+(1)(3)H <sub>2</sub> O                            | $\beta$ -pyranose ( ${}^2C_5$ -chair)<br>+(1)(2)H <sub>2</sub> O+(3)(4)H <sub>2</sub> O                |
| $\Delta E$ (eV)             | 0.11                                                                                                   | 0.12                                                                                       | 0.14                                                                                        | 0.16                                                                                        | 0.18                                                                                                   |
| Optimized Neutral structure |                                                                                                        |                                                                                            |                                                                                             |                                                                                             |                                                                                                        |
| Structural Polymorphism     | $\beta$ -pyranose ( ${}^2C_5$ -chair)<br>+(1)(3)H <sub>2</sub> O+(3)(4)H <sub>2</sub> O                | open chain (A)<br>+(6)(intra)H <sub>2</sub> O+(4)(intra)H <sub>2</sub> O                   | $\beta$ -pyranose ( ${}^2C_5$ -chair)<br>+(1)(3)H <sub>2</sub> O+(4)(5)H <sub>2</sub> O     | $\alpha$ -furanose (C <sub>4</sub> -endo)<br>+(1)(2)H <sub>2</sub> O+(1)(3)H <sub>2</sub> O | open chain (C)<br>+(1)(2)H <sub>2</sub> O+(1)(3)H <sub>2</sub> O                                       |
| $\Delta E$ (eV)             | 0.21                                                                                                   | 0.21                                                                                       | 0.21                                                                                        | 0.21                                                                                        | 0.23                                                                                                   |
| Optimized Neutral structure |                                                                                                        |                                                                                            |                                                                                             |                                                                                             |                                                                                                        |
| Structural Polymorphism     | open chain (C)<br>+(1)(intra)H <sub>2</sub> O+(2)(intra)H <sub>2</sub> O                               | $\beta$ -pyranose ( ${}^2C_5$ -chair)<br>+(1)(3)H <sub>2</sub> O+(1)(2)(3)H <sub>2</sub> O | open chain (B)<br>+(1)(intra)H <sub>2</sub> O+(2)(intra)H <sub>2</sub> O                    | open chain (A)<br>+(4)(6)(intra)H <sub>2</sub> O+(1)(intra)H <sub>2</sub> O                 | open chain (B)<br>+(1)(2)H <sub>2</sub> O+(1)(3)H <sub>2</sub> O                                       |
| $\Delta E$ (eV)             | 0.23                                                                                                   | 0.24                                                                                       | 0.25                                                                                        | 0.27                                                                                        | 0.29                                                                                                   |
| Optimized Neutral structure |                                                                                                        |                                                                                            |                                                                                             |                                                                                             |                                                                                                        |
| Structural Polymorphism     | $\alpha$ -furanose (C <sub>4</sub> -endo)<br>+(3)(intra)H <sub>2</sub> O+(4)(intra)H <sub>2</sub> O    | open chain (A)<br>+(1)(2)H <sub>2</sub> O+(5)(6)H <sub>2</sub> O                           | $\alpha$ -furanose (C <sub>4</sub> -endo)<br>+(1)(2)H <sub>2</sub> O+(3)(4)H <sub>2</sub> O | open chain (C)<br>+(3)(5)H <sub>2</sub> O+(5)(6)H <sub>2</sub> O                            | open chain (C)<br>+(5)(intra)H <sub>2</sub> O+(4)(intra)H <sub>2</sub> O                               |

| $\Delta E$ (eV)             | 0.30                                                                              | 0.31                                                                              | 0.32                                                                               | 0.33                                                                                | 0.34                                                                                                |
|-----------------------------|-----------------------------------------------------------------------------------|-----------------------------------------------------------------------------------|------------------------------------------------------------------------------------|-------------------------------------------------------------------------------------|-----------------------------------------------------------------------------------------------------|
| Optimized Neutral structure | 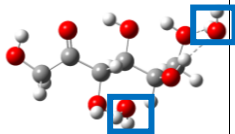 |  |  |  |                  |
| Structural Polymorphism     | open chain (A)<br>+(3)H <sub>2</sub> O+(5)(6)H <sub>2</sub> O                     | open chain (A)<br>+(3)(intra)H <sub>2</sub> O+(i<br>ntra)H <sub>2</sub> O         | open chain (A)<br>+(1)(2)H <sub>2</sub> O+(1)H <sub>2</sub> O                      | open chain (C)<br>+(3)(5)H <sub>2</sub> O+(1)(2)H <sub>2</sub> O                    | $\alpha$ -furanose (C <sub>4</sub> -<br>endo)<br>+(3)(4)H <sub>2</sub> O+<br>(1)(3)H <sub>2</sub> O |
| $\Delta E$ (eV)             | 0.35                                                                              | 0.38                                                                              | 0.39                                                                               | 0.39                                                                                | 0.40                                                                                                |
| Optimized Neutral structure |  |  |  |                                                                                     |                                                                                                     |
| Structural Polymorphism     | open chain (A)<br>+(1)(intra)H <sub>2</sub> O+(i<br>ntra)H <sub>2</sub> O         | open chain (B)<br>+(1)(2)H <sub>2</sub> O+(5)(6<br>)H <sub>2</sub> O              | open chain (C)<br>+(1)(2)H <sub>2</sub> O+(5)(6)H <sub>2</sub> O                   |                                                                                     |                                                                                                     |
| $\Delta E$ (eV)             | 0.43                                                                              | 0.43                                                                              | 0.47                                                                               |                                                                                     |                                                                                                     |

Figure S12 Optimized geometries of the typical low lying neutral isomers of (fructose+(H<sub>2</sub>O)<sub>2</sub>) based on B3LYP/6-311++G(d,p) calculations. The relative energies and structural polymorphs are indicated. The blue squares indicate addition of H<sub>2</sub>O units at the marked position. The C ordering is the same as that of fructose<sup>-</sup> parent anions. For open chain structures (1)C to (6)C is ordered from left to right. For both furanose and pyranose structures (1)C to (6)C is ordered from right to left in a clockwise direction.



|                             |                                                                                                                               |                                                                                                                                                                |                                                                                                                                 |                                                                                                 |                                                                                                                                  |
|-----------------------------|-------------------------------------------------------------------------------------------------------------------------------|----------------------------------------------------------------------------------------------------------------------------------------------------------------|---------------------------------------------------------------------------------------------------------------------------------|-------------------------------------------------------------------------------------------------|----------------------------------------------------------------------------------------------------------------------------------|
| Optimized Neutral structure |                                                                                                                               |                                                                                                                                                                |                                                                                                                                 |                                                                                                 |                                                                                                                                  |
| Structural Polymorphism     | $\beta$ -pyranose ( $^2C_5$ -chair) +<br>+(1)(3)(intra)H <sub>2</sub> O+(1)(3)(intra)H <sub>2</sub> O+(intra)H <sub>2</sub> O | open chain (A)+(1)(2)(intra)H <sub>2</sub> O+(1)(intra)H <sub>2</sub> O+(4)(intra)H <sub>2</sub> O                                                             | open chain (C)+(1)(4)(intra)H <sub>2</sub> O+(2)(intra)H <sub>2</sub> O+(intra)H <sub>2</sub> O                                 | open chain (C)+(1)(4)(intra)H <sub>2</sub> O+(2)(intra)H <sub>2</sub> O+(intra)H <sub>2</sub> O | $\beta$ -pyranose ( $^2C_5$ -chair) +<br>+(2)(3)(intra)H <sub>2</sub> O+(1)(intra)H <sub>2</sub> O+(1)(3)(intra)H <sub>2</sub> O |
| $\Delta E$ (eV)             | 0.00                                                                                                                          | 0.05                                                                                                                                                           | 0.08                                                                                                                            | 0.08                                                                                            | 0.09                                                                                                                             |
| Optimized Neutral structure |                                                                                                                               |                                                                                                                                                                |                                                                                                                                 |                                                                                                 |                                                                                                                                  |
| Structural Polymorphism     | $\beta$ -pyranose ( $^2C_5$ -chair) +<br>+(1)(3)(intra)H <sub>2</sub> O+(3)(intra)H <sub>2</sub> O+(4)(intra)H <sub>2</sub> O | open chain (A)+(1)(intra)H <sub>2</sub> O+(2)(intra)H <sub>2</sub> O+(intra)H <sub>2</sub> O                                                                   | $\beta$ -pyranose ( $^2C_5$ -chair) +<br>+(1)(3)(intra)H <sub>2</sub> O+(3)(4)(intra)H <sub>2</sub> O+(1)H <sub>2</sub> O       | open chain (A)+(1)(intra)H <sub>2</sub> O+(2)(intra)H <sub>2</sub> O+(3)(intra)H <sub>2</sub> O | open chain (A)+(1)(intra)H <sub>2</sub> O+(2)(intra)H <sub>2</sub> O+(1)(4)H <sub>2</sub> O                                      |
| $\Delta E$ (eV)             | 0.14                                                                                                                          | 0.14                                                                                                                                                           | 0.14                                                                                                                            | 0.15                                                                                            | 0.16                                                                                                                             |
| Optimized Neutral structure |                                                                                                                               |                                                                                                                                                                |                                                                                                                                 |                                                                                                 |                                                                                                                                  |
| Structural Polymorphism     | open chain (C)+(1)(2)H <sub>2</sub> O+(1)(intra)H <sub>2</sub> O+(4)(intra)H <sub>2</sub> O                                   | $\alpha$ -furanose (C <sub>4</sub> -endo) +<br>(3)(4)H <sub>2</sub> O+(4)(6)H <sub>2</sub> O+(3)(6)H <sub>2</sub> O                                            | $\alpha$ -furanose (C <sub>4</sub> -endo) +<br>(4)(intra)H <sub>2</sub> O+(4)(6)(intra)H <sub>2</sub> O+(intra)H <sub>2</sub> O | open chain (A)+(1)(3)(intra)H <sub>2</sub> O+(3)(intra)H <sub>2</sub> O+(intra)H <sub>2</sub> O | open chain (A)+(1)(intra)H <sub>2</sub> O+(1)(intra)H <sub>2</sub> O+(intra)H <sub>2</sub> O                                     |
| $\Delta E$ (eV)             | 0.16                                                                                                                          | 0.17                                                                                                                                                           | 0.21                                                                                                                            | 0.23                                                                                            | 0.24                                                                                                                             |
| Optimized Neutral structure |                                                                                                                               |                                                                                                                                                                |                                                                                                                                 |                                                                                                 |                                                                                                                                  |
| Structural Polymorphism     | open chain (B)+(1)(2)(intra)H <sub>2</sub> O+(1)(intra)H <sub>2</sub> O+(3)(intra)H <sub>2</sub> O                            | $\alpha$ -furanose (C <sub>4</sub> -endo) +<br>(1)(3)(intra)H <sub>2</sub> O+(3)(4)(intra)H <sub>2</sub> O+(intra)H <sub>2</sub> O                             | open chain (A)+(1)(intra)H <sub>2</sub> O+(2)(intra)H <sub>2</sub> O+(5)(6)H <sub>2</sub> O                                     | open chain (B)+(1)(intra)H <sub>2</sub> O+(2)(intra)H <sub>2</sub> O+(intra)H <sub>2</sub> O    | $\beta$ -pyranose ( $^2C_5$ -chair) +<br>(3)(4)H <sub>2</sub> O+(1)(3)H <sub>2</sub> O+(4)(5)H <sub>2</sub> O                    |
| $\Delta E$ (eV)             | 0.26                                                                                                                          | 0.26                                                                                                                                                           | 0.29                                                                                                                            | 0.30                                                                                            | 0.30                                                                                                                             |
| Optimized Neutral structure |                                                                                                                               |                                                                                                                                                                |                                                                                                                                 |                                                                                                 |                                                                                                                                  |
| Structural Polymorphism     | open chain (B)+(1)(2)H <sub>2</sub> O+(1)(intra)H <sub>2</sub> O+(3)(intra)H <sub>2</sub> O                                   | $\alpha$ -furanose (C <sub>4</sub> -endo) +<br>(1)(3)(intra)H <sub>2</sub> O+(1)(3)(intra)H <sub>2</sub> O+(1)(2)(3)H <sub>2</sub> O+(1)(2)(3)H <sub>2</sub> O | open chain (A)+(1)(2)H <sub>2</sub> O+(1)(3)H <sub>2</sub> O+(4)(5)(6)H <sub>2</sub> O                                          | open chain (A)+(4)(6)(intra)H <sub>2</sub> O+(4)(intra)H <sub>2</sub> O+(intra)H <sub>2</sub> O | $\beta$ -pyranose ( $^2C_5$ -chair) +<br>(1)(2)(3)H <sub>2</sub> O+(1)(2)(3)H <sub>2</sub> O                                     |

|                             |                                                                                                   |                                                                                                                                   |                                                                                                                                        |                                                                                                                                        |                                                                                                                                        |
|-----------------------------|---------------------------------------------------------------------------------------------------|-----------------------------------------------------------------------------------------------------------------------------------|----------------------------------------------------------------------------------------------------------------------------------------|----------------------------------------------------------------------------------------------------------------------------------------|----------------------------------------------------------------------------------------------------------------------------------------|
|                             |                                                                                                   | 3)(6)(intra)H <sub>2</sub> O+(intra)H <sub>2</sub> O                                                                              |                                                                                                                                        |                                                                                                                                        | 1)(3)H <sub>2</sub> O+(4)(5)H <sub>2</sub> O                                                                                           |
| $\Delta E$ (eV)             | 0.31                                                                                              | 0.32                                                                                                                              | 0.34                                                                                                                                   | 0.35                                                                                                                                   | 0.35                                                                                                                                   |
| Optimized Neutral structure | 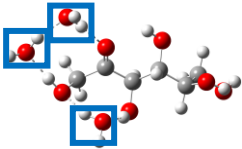                 |                                                  |                                                      |                                                     |                                                     |
| Structural Polymorphism     | open chain (B)+(1)(intra)H <sub>2</sub> O+(2)(intra)H <sub>2</sub> O+(1)(3)H <sub>2</sub> O       | $\beta$ -pyranose ( <sup>2</sup> C <sub>5</sub> -chair) + (3)(4)H <sub>2</sub> O+(1)(3)H <sub>2</sub> O+(1)(2)(3)H <sub>2</sub> O | $\beta$ -pyranose ( <sup>2</sup> C <sub>5</sub> -chair) + (1)(intra)H <sub>2</sub> O+(3)(intra)H <sub>2</sub> O+(4)(5)H <sub>2</sub> O | open chain (C)+(1)(intra)H <sub>2</sub> O+(2)(intra)H <sub>2</sub> O+(3)(5)H <sub>2</sub> O                                            | $\alpha$ -furanose (C <sub>4</sub> -endo) + (1)(2)(intra)H <sub>2</sub> O + (1)(3)(intra)H <sub>2</sub> O + (3)(intra)H <sub>2</sub> O |
| $\Delta E$ (eV)             | 0.37                                                                                              | 0.37                                                                                                                              | 0.39                                                                                                                                   | 0.39                                                                                                                                   | 0.39                                                                                                                                   |
| Optimized Neutral structure |                  |                                                  |                                                      |                                                     |                                                     |
| Structural Polymorphism     | open chain (C)+(1)(intra)H <sub>2</sub> O+(2)(intra)H <sub>2</sub> O+(1)(3)H <sub>2</sub> O       | open chain (A)+(1)(2)(intra)H <sub>2</sub> O+(1)(3)(intra)H <sub>2</sub> O+(intra)H <sub>2</sub> O                                | $\beta$ -pyranose ( <sup>2</sup> C <sub>5</sub> -chair) + (3)(4)H <sub>2</sub> O+(4)(intra)H <sub>2</sub> O+(5)(intra)H <sub>2</sub> O | $\beta$ -pyranose ( <sup>2</sup> C <sub>5</sub> -chair) + (4)(5)(intra)H <sub>2</sub> O+(1)(3)H <sub>2</sub> O+(intra)H <sub>2</sub> O | open chain (B)+(1)(intra)H <sub>2</sub> O+(2)(intra)H <sub>2</sub> O+(5)(6)H <sub>2</sub> O                                            |
| $\Delta E$ (eV)             | 0.40                                                                                              | 0.42                                                                                                                              | 0.42                                                                                                                                   | 0.42                                                                                                                                   | 0.42                                                                                                                                   |
| Optimized Neutral structure |                |                                                |                                                    |                                                   |                                                   |
| Structural Polymorphism     | open chain (A)+(5)(6)H <sub>2</sub> O+(6)(intra)H <sub>2</sub> O+(2)(intra)H <sub>2</sub> O       | open chain (A)+(1)(2)H <sub>2</sub> O+(1)(3)H <sub>2</sub> O+(4)(5)H <sub>2</sub> O                                               | $\alpha$ -furanose (C <sub>4</sub> -endo) + (1)(2)H <sub>2</sub> O+(1)(3)H <sub>2</sub> O+(3)(4)H <sub>2</sub> O                       | open chain (C)+(1)(intra)H <sub>2</sub> O+(2)(intra)H <sub>2</sub> O+(5)(6)H <sub>2</sub> O                                            | open chain (B)+(1)(2)H <sub>2</sub> O+(1)(3)H <sub>2</sub> O+(5)(6)H <sub>2</sub> O                                                    |
| $\Delta E$ (eV)             | 0.45                                                                                              | 0.45                                                                                                                              | 0.46                                                                                                                                   | 0.47                                                                                                                                   | 0.47                                                                                                                                   |
| Optimized Neutral structure |                |                                                |                                                    |                                                   |                                                   |
| Structural Polymorphism     | open chain (B)+(1)(2)H <sub>2</sub> O+(5)(6)(intra)H <sub>2</sub> O+(5)(6)(intra)H <sub>2</sub> O | open chain (B)+(1)(intra)H <sub>2</sub> O+(2)(intra)H <sub>2</sub> O+(1)(intra)H <sub>2</sub> O                                   | open chain (A)+(5)(6)(intra)H <sub>2</sub> O+(5)(intra)H <sub>2</sub> O+(3)H <sub>2</sub> O                                            | open chain (A)+(5)(6)(intra)H <sub>2</sub> O+(4)(6)(intra)H <sub>2</sub> O+(2)(intra)H <sub>2</sub> O                                  | open chain (A)+(4)(6)H <sub>2</sub> O+(3)H <sub>2</sub> O+(intra)H <sub>2</sub> O                                                      |
| $\Delta E$ (eV)             | 0.47                                                                                              | 0.53                                                                                                                              | 0.57                                                                                                                                   | 0.58                                                                                                                                   | 0.60                                                                                                                                   |
| Optimized Neutral structure |                |                                                |                                                    |                                                                                                                                        |                                                                                                                                        |

|                            |                                                                                      |                                                                                                        |                                                                                                |  |  |
|----------------------------|--------------------------------------------------------------------------------------|--------------------------------------------------------------------------------------------------------|------------------------------------------------------------------------------------------------|--|--|
| Structural<br>Polymorphism | open chain<br>(C)+(1)(2)H <sub>2</sub> O+(4)<br>H <sub>2</sub> O+(5)H <sub>2</sub> O | open chain<br>(A)+(1)(2)(intra)H <sub>2</sub><br>O+(intra)H <sub>2</sub> O+(4)(5)<br>)H <sub>2</sub> O | open chain<br>(C)+(1)(2)H <sub>2</sub> O+(5)<br>(6)H <sub>2</sub> O+(intra)H <sub>2</sub><br>O |  |  |
| $\Delta E$ (eV)            | 0.61                                                                                 | 0.61                                                                                                   | 0.66                                                                                           |  |  |

Figure S13 Optimized geometries of the typical low lying neutral isomers of (fructose+(H<sub>2</sub>O)<sub>3</sub>) based on B3LYP/6-31++G(d) calculations. The relative energies and structural polymorphs are indicated. The blue squares indicate addition of H<sub>2</sub>O units at the marked position. The C ordering is the same as that of fructose<sup>-</sup> parent anions. For open chain structures (1)C to (6)C is ordered from left to right. For both furanose and pyranose structures (1)C to (6)C is ordered from right to left in a clockwise direction.

|                             |                                                                                                                                                              |                                                                                                                                                                 |                                                                                                                                 |                                                                                                                                                    |                                                                                                                                                       |
|-----------------------------|--------------------------------------------------------------------------------------------------------------------------------------------------------------|-----------------------------------------------------------------------------------------------------------------------------------------------------------------|---------------------------------------------------------------------------------------------------------------------------------|----------------------------------------------------------------------------------------------------------------------------------------------------|-------------------------------------------------------------------------------------------------------------------------------------------------------|
| Optimized Neutral structure |                                                                                                                                                              |                                                                                                                                                                 |                                                                                                                                 |                                                                                                                                                    |                                                                                                                                                       |
| Structural Polymorphism     | $\beta$ -pyranose ( ${}^2C_5$ -chair) + (1)(3)(intra)H <sub>2</sub> O + (3)(intra)H <sub>2</sub> O + (intra)H <sub>2</sub> O + (1)(2)(intra)H <sub>2</sub> O | $\beta$ -pyranose ( ${}^2C_5$ -chair) + (1)(3)(intra)H <sub>2</sub> O + (3)(4)H <sub>2</sub> O + (4)(intra)H <sub>2</sub> O + (intra)H <sub>2</sub> O           | open chain (C) + (1)(intra)H <sub>2</sub> O + (2)(intra)H <sub>2</sub> O + (4)(intra)H <sub>2</sub> O + (intra)H <sub>2</sub> O | open chain (A) + (1)(intra)H <sub>2</sub> O + (3)(intra)H <sub>2</sub> O + (3)(intra)H <sub>2</sub> O + (intra)H <sub>2</sub> O                    | open chain (A) + (1)(intra)H <sub>2</sub> O + (3)(intra)H <sub>2</sub> O + (3)(intra)H <sub>2</sub> O + (intra)H <sub>2</sub> O                       |
| $\Delta E$ (eV)             | 0.00                                                                                                                                                         | 0.14                                                                                                                                                            | 0.19                                                                                                                            | 0.25                                                                                                                                               | 0.25                                                                                                                                                  |
| Optimized Neutral structure |                                                                                                                                                              |                                                                                                                                                                 |                                                                                                                                 |                                                                                                                                                    |                                                                                                                                                       |
| Structural Polymorphism     | $\beta$ -pyranose ( ${}^2C_5$ -chair) + (1)(intra)H <sub>2</sub> O + (3)(4)(intra)H <sub>2</sub> O + (4)(intra)H <sub>2</sub> O + (intra)H <sub>2</sub> O    | open chain (C) + (1)(4)(intra)H <sub>2</sub> O + (2)(intra)H <sub>2</sub> O + (intra)H <sub>2</sub> O + (1)(3)H <sub>2</sub> O                                  | open chain (A) + (1)(intra)H <sub>2</sub> O + (2)(intra)H <sub>2</sub> O + (3)(intra)H <sub>2</sub> O + (intra)H <sub>2</sub> O | $\beta$ -pyranose ( ${}^2C_5$ -chair) + (1)(2)(3)(intra)H <sub>2</sub> O + (intra)H <sub>2</sub> O + (intra)H <sub>2</sub> O                       | $\alpha$ -furanose ( $C_4$ -endo) + (3)(4)H <sub>2</sub> O + (4)(intra)H <sub>2</sub> O + (6)(intra)H <sub>2</sub> O + (intra)(intra)H <sub>2</sub> O |
| $\Delta E$ (eV)             | 0.26                                                                                                                                                         | 0.27                                                                                                                                                            | 0.31                                                                                                                            | 0.31                                                                                                                                               | 0.32                                                                                                                                                  |
| Optimized Neutral structure |                                                                                                                                                              |                                                                                                                                                                 |                                                                                                                                 |                                                                                                                                                    |                                                                                                                                                       |
| Structural Polymorphism     | $\beta$ -pyranose ( ${}^2C_5$ -chair) + (1)(intra)H <sub>2</sub> O + (2)(3)(intra)H <sub>2</sub> O + (1)(3)(intra)H <sub>2</sub> O + (4)(5)H <sub>2</sub> O  | $\beta$ -pyranose ( ${}^2C_5$ -chair) + (1)(intra)H <sub>2</sub> O + (1)(3)(intra)H <sub>2</sub> O + (2)(intra)H <sub>2</sub> O + (3)(4)(intra)H <sub>2</sub> O | open chain (C) + (1)(4)(intra)H <sub>2</sub> O + (2)(intra)H <sub>2</sub> O + (intra)H <sub>2</sub> O + (intra)H <sub>2</sub> O | $\alpha$ -furanose ( $C_4$ -endo) + (1)(intra)H <sub>2</sub> O + (2)(intra)H <sub>2</sub> O + (3)(intra)H <sub>2</sub> O + (intra)H <sub>2</sub> O | open chain (A) + (1)(2)(intra)H <sub>2</sub> O + (1)(intra)H <sub>2</sub> O + (3)(intra)H <sub>2</sub> O + (intra)H <sub>2</sub> O                    |
| $\Delta E$ (eV)             | 0.36                                                                                                                                                         | 0.37                                                                                                                                                            | 0.39                                                                                                                            | 0.40                                                                                                                                               | 0.42                                                                                                                                                  |
| Optimized Neutral structure |                                                                                                                                                              |                                                                                                                                                                 |                                                                                                                                 |                                                                                                                                                    |                                                                                                                                                       |
| Structural Polymorphism     | open chain (A) + (1)(intra)H <sub>2</sub> O + (1)H <sub>2</sub> O + (2)(intra)H <sub>2</sub> O + (intra)H <sub>2</sub> O                                     | open chain (A) + (3)(6)H <sub>2</sub> O + (4)(5)H <sub>2</sub> O + (4)(intra)H <sub>2</sub> O + (intra)H <sub>2</sub> O                                         | open chain (A) + (1)(intra)H <sub>2</sub> O + (1)(intra)H <sub>2</sub> O + (2)(intra)H <sub>2</sub> O + (intra)H <sub>2</sub> O | $\alpha$ -furanose ( $C_4$ -endo) + (3)(intra)H <sub>2</sub> O + (3)(intra)H <sub>2</sub> O + (4)(intra)H <sub>2</sub> O + (intra)H <sub>2</sub> O | $\beta$ -pyranose ( ${}^2C_5$ -chair) + (1)(2)H <sub>2</sub> O + (1)(intra)H <sub>2</sub> O + (4)(intra)H <sub>2</sub> O + (3)(4)H <sub>2</sub> O     |
| $\Delta E$ (eV)             | 0.42                                                                                                                                                         | 0.42                                                                                                                                                            | 0.42                                                                                                                            | 0.43                                                                                                                                               | 0.43                                                                                                                                                  |

|                             |                                                                                                                                                               |                                                                                                                                       |                                                                                                                                       |                                                                                                                                                                            |                                                                                                                                    |
|-----------------------------|---------------------------------------------------------------------------------------------------------------------------------------------------------------|---------------------------------------------------------------------------------------------------------------------------------------|---------------------------------------------------------------------------------------------------------------------------------------|----------------------------------------------------------------------------------------------------------------------------------------------------------------------------|------------------------------------------------------------------------------------------------------------------------------------|
| Optimized Neutral structure | 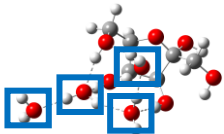                                                                             |                                                      |                                                     |                                                                                          |                                                  |
| Structural Polymorphism     | $\alpha$ -furanose (C <sub>4</sub> -endo) + (3)(intra)H <sub>2</sub> O + (4)(6)(intra)H <sub>2</sub> O + (6)(intra)H <sub>2</sub> O + (intra)H <sub>2</sub> O | open chain (A) + (1)(intra)H <sub>2</sub> O + (2)(intra)H <sub>2</sub> O + (intra)H <sub>2</sub> O + (5)(6)H <sub>2</sub> O           | open chain (A) + (1)(intra)H <sub>2</sub> O + (2)(intra)H <sub>2</sub> O + (intra)H <sub>2</sub> O + (intra)H <sub>2</sub> O          | open chain (A) + (1)(intra)H <sub>2</sub> O + (2)(intra)H <sub>2</sub> O + (intra)H <sub>2</sub> O + (intra)H <sub>2</sub> O                                               | open chain (A) + (1)(2)(intra)H <sub>2</sub> O + (1)(intra)H <sub>2</sub> O + (3)(intra)H <sub>2</sub> O + (intra)H <sub>2</sub> O |
| $\Delta E$ (eV)             | 0.44                                                                                                                                                          | 0.44                                                                                                                                  | 0.45                                                                                                                                  | 0.46                                                                                                                                                                       | 0.48                                                                                                                               |
| Optimized Neutral structure |                                                                              |                                                      |                                                     |                                                                                         |                                                 |
| Structural Polymorphism     | open chain (A) + (1)(2)(intra)H <sub>2</sub> O + (1)(intra)H <sub>2</sub> O + (3)(intra)H <sub>2</sub> O + (5)(6)H <sub>2</sub> O                             | open chain (B) + (1)(2)(intra)H <sub>2</sub> O + (3)(intra)H <sub>2</sub> O + (1)(3)(intra)H <sub>2</sub> O + (intra)H <sub>2</sub> O | open chain (C) + (1)(2)(intra)H <sub>2</sub> O + (3)(intra)H <sub>2</sub> O + (1)(3)(intra)H <sub>2</sub> O + (intra)H <sub>2</sub> O | open chain (A) + (1)(intra)H <sub>2</sub> O + (2)(4)(intra)H <sub>2</sub> O + (1)(5)(intra)H <sub>2</sub> O + (intra)H <sub>2</sub> O                                      | open chain (A) + (1)(intra)H <sub>2</sub> O + (2)(intra)H <sub>2</sub> O + (1)(3)H <sub>2</sub> O + (5)(6)H <sub>2</sub> O         |
| $\Delta E$ (eV)             | 0.49                                                                                                                                                          | 0.49                                                                                                                                  | 0.50                                                                                                                                  | 0.51                                                                                                                                                                       | 0.53                                                                                                                               |
| Optimized Neutral structure |                                                                             |                                                    |                                                    |                                                                                        |                                                |
| Structural Polymorphism     | open chain (A) + (1)(3)(intra)H <sub>2</sub> O + (3)(intra)H <sub>2</sub> O + (intra)H <sub>2</sub> O + (5)(6)H <sub>2</sub> O                                | open chain (B) + (1)(2)(intra)H <sub>2</sub> O + (1)(intra)H <sub>2</sub> O + (3)(intra)H <sub>2</sub> O + (5)(6)H <sub>2</sub> O     | open chain (A) + (3)(5)H <sub>2</sub> O + (4)(6)(intra)H <sub>2</sub> O + (intra)H <sub>2</sub> O + (intra)H <sub>2</sub> O           | $\beta$ -pyranose ( <sup>2</sup> C <sub>5</sub> -chair) + (1)(intra)H <sub>2</sub> O + (2)(3)(intra)H <sub>2</sub> O + (1)(3)H <sub>2</sub> O + (2)(intra)H <sub>2</sub> O | open chain (B) + (1)(intra)H <sub>2</sub> O + (2)(intra)H <sub>2</sub> O + (intra)H <sub>2</sub> O + (5)(6)H <sub>2</sub> O        |
| $\Delta E$ (eV)             | 0.54                                                                                                                                                          | 0.54                                                                                                                                  | 0.56                                                                                                                                  | 0.56                                                                                                                                                                       | 0.57                                                                                                                               |
| Optimized Neutral structure |                                                                            |                                                    |                                                   |                                                                                       |                                               |
| Structural Polymorphism     | open chain (A) + (1)(intra)H <sub>2</sub> O + (intra)H <sub>2</sub> O + (4)(6)(intra)H <sub>2</sub> O + (5)(6)H <sub>2</sub> O                                | open chain (B) + (1)(intra)H <sub>2</sub> O + (1)(intra)H <sub>2</sub> O + (2)(intra)H <sub>2</sub> O + (intra)H <sub>2</sub> O       | open chain (A) + (1)(2)(intra)H <sub>2</sub> O + (1)(intra)H <sub>2</sub> O + (3)(intra)H <sub>2</sub> O + (intra)H <sub>2</sub> O    | open chain (A) + (1)(intra)H <sub>2</sub> O + (2)(intra)H <sub>2</sub> O + (3)H <sub>2</sub> O + (5)(6)H <sub>2</sub> O                                                    | open chain (A) + (1)(intra)H <sub>2</sub> O + (4)(6)(intra)H <sub>2</sub> O + (intra)H <sub>2</sub> O + (intra)H <sub>2</sub> O    |
| $\Delta E$ (eV)             | 0.57                                                                                                                                                          | 0.58                                                                                                                                  | 0.59                                                                                                                                  | 0.61                                                                                                                                                                       | 0.63                                                                                                                               |

|                             |                                                                                                                                                       |                                                                                                                                                                 |                                                                                                                                                        |                                                                                                                                       |                                                                                                                               |
|-----------------------------|-------------------------------------------------------------------------------------------------------------------------------------------------------|-----------------------------------------------------------------------------------------------------------------------------------------------------------------|--------------------------------------------------------------------------------------------------------------------------------------------------------|---------------------------------------------------------------------------------------------------------------------------------------|-------------------------------------------------------------------------------------------------------------------------------|
| Optimized Neutral structure |                                                                                                                                                       |                                                                                                                                                                 |                                                                                                                                                        |                                                                                                                                       |                                                                                                                               |
| Structural Polymorphism     | $\beta$ -pyranose ( $^2C_5$ -chair) + (1)(2)H <sub>2</sub> O + (1)(3)H <sub>2</sub> O + (3)(4)H <sub>2</sub> O + (4)(5)H <sub>2</sub> O               | $\alpha$ -furanose (C <sub>4</sub> -endo) + (1)(3)(intra)H <sub>2</sub> O + (3)(6)(intra)H <sub>2</sub> O + (intra)H <sub>2</sub> O + (intra)H <sub>2</sub> O   | open chain (A) + (1)(intra)H <sub>2</sub> O + (2)(intra)H <sub>2</sub> O + (4)(6)H <sub>2</sub> O + (4)(5)(6)H <sub>2</sub> O                          | open chain (A) + (3)H <sub>2</sub> O + (5)(6)H <sub>2</sub> O + (intra)H <sub>2</sub> O + (5)(intra)H <sub>2</sub> O                  | open chain (A) + (1)(intra)H <sub>2</sub> O + (1)(intra)H <sub>2</sub> O + (4)(5)H <sub>2</sub> O + (intra)H <sub>2</sub> O   |
| $\Delta E$ (eV)             | 0.64                                                                                                                                                  | 0.65                                                                                                                                                            | 0.65                                                                                                                                                   | 0.65                                                                                                                                  | 0.66                                                                                                                          |
| Optimized Neutral structure |                                                                                                                                                       |                                                                                                                                                                 |                                                                                                                                                        |                                                                                                                                       |                                                                                                                               |
| Structural Polymorphism     | $\alpha$ -furanose (C <sub>4</sub> -endo) + (1)(3)H <sub>2</sub> O + (3)(6)(intra)H <sub>2</sub> O + (intra)H <sub>2</sub> O + (4)(6)H <sub>2</sub> O | open chain (A) + (1)(intra)H <sub>2</sub> O + (2)(intra)H <sub>2</sub> O + (4)(5)(6)H <sub>2</sub> O + (intra)H <sub>2</sub> O                                  | open chain (A) + (1)(2)H <sub>2</sub> O + (1)(3)(intra)H <sub>2</sub> O + (4)(5)(intra)H <sub>2</sub> O + (5)(intra)H <sub>2</sub> O                   | open chain (C) + (1)(intra)H <sub>2</sub> O + (2)(intra)H <sub>2</sub> O + (5)(intra)H <sub>2</sub> O + (6)(intra)H <sub>2</sub> O    | open chain (A) + (1)(2)H <sub>2</sub> O + (1)(3)H <sub>2</sub> O + (4)(5)(intra)H <sub>2</sub> O + (6)(intra)H <sub>2</sub> O |
| $\Delta E$ (eV)             | 0.67                                                                                                                                                  | 0.67                                                                                                                                                            | 0.70                                                                                                                                                   | 0.70                                                                                                                                  | 0.72                                                                                                                          |
| Optimized Neutral structure |                                                                                                                                                       |                                                                                                                                                                 |                                                                                                                                                        |                                                                                                                                       |                                                                                                                               |
| Structural Polymorphism     | open chain (A) + (1)(2)(intra)H <sub>2</sub> O + (1)(intra)H <sub>2</sub> O + (5)(6)H <sub>2</sub> O + (intra)H <sub>2</sub> O                        | $\alpha$ -furanose (C <sub>4</sub> -endo) + (1)(2)(intra)H <sub>2</sub> O + (2)(intra)H <sub>2</sub> O + (1)(3)(intra)H <sub>2</sub> O + (3)(4)H <sub>2</sub> O | open chain (A) + (1)(2)(intra)H <sub>2</sub> O + (1)(3)(intra)H <sub>2</sub> O + (intra)H <sub>2</sub> O + (5)(6)H <sub>2</sub> O                      | open chain (B) + (1)(intra)H <sub>2</sub> O + (2)(intra)H <sub>2</sub> O + (intra)H <sub>2</sub> O + (intra)H <sub>2</sub> O          | open chain (A) + (1)(2)(intra)H <sub>2</sub> O + (intra)H <sub>2</sub> O + (1)(3)H <sub>2</sub> O + (4)(5)H <sub>2</sub> O    |
| $\Delta E$ (eV)             | 0.72                                                                                                                                                  | 0.72                                                                                                                                                            | 0.73                                                                                                                                                   | 0.73                                                                                                                                  | 0.78                                                                                                                          |
| Optimized Neutral structure |                                                                                                                                                       |                                                                                                                                                                 |                                                                                                                                                        |                                                                                                                                       |                                                                                                                               |
| Structural Polymorphism     | open chain (A) + (1)(3)(intra)H <sub>2</sub> O + (1)(intra)H <sub>2</sub> O + (2)(intra)H <sub>2</sub> O + (intra)H <sub>2</sub> O                    | open chain (C) + (1)(2)H <sub>2</sub> O + (3)(5)H <sub>2</sub> O + (5)(6)(intra)H <sub>2</sub> O + (4)(intra)H <sub>2</sub> O                                   | $\alpha$ -furanose (C <sub>4</sub> -endo) + (1)(3)H <sub>2</sub> O + (3)(intra)H <sub>2</sub> O + (4)(intra)H <sub>2</sub> O + (intra)H <sub>2</sub> O | open chain (A) + (1)(2)(intra)H <sub>2</sub> O + (intra)H <sub>2</sub> O + (4)(5)(intra)H <sub>2</sub> O + (6)(intra)H <sub>2</sub> O | open chain (C) + (1)(2)(intra)H <sub>2</sub> O + (intra)H <sub>2</sub> O + (3)(5)H <sub>2</sub> O + (4)H <sub>2</sub> O       |
| $\Delta E$ (eV)             | 0.81                                                                                                                                                  | 0.82                                                                                                                                                            | 0.82                                                                                                                                                   | 0.88                                                                                                                                  | 0.95                                                                                                                          |

Figure S14 Optimized geometries of the typical low lying neutral isomers of (fructose+(H<sub>2</sub>O)<sub>4</sub>) based on B3LYP/6-31++G(d) calculations. The relative energies and structural polymorphs are indicated. The blue squares indicate addition of H<sub>2</sub>O units at the marked position. The C ordering is the same as that of fructose<sup>-</sup> parent anions. For open chain structures (1)C to (6)C

is ordered from left to right. For both furanose and pyranose structures (1)C to (6)C is ordered from right to left in a clockwise direction.



|                             |                                                                                                                                                                                      |                                                                                                                                                                                         |                                                                                                                                                                                         |                                                                                                                                                                                            |                                                                                                                                                                                         |
|-----------------------------|--------------------------------------------------------------------------------------------------------------------------------------------------------------------------------------|-----------------------------------------------------------------------------------------------------------------------------------------------------------------------------------------|-----------------------------------------------------------------------------------------------------------------------------------------------------------------------------------------|--------------------------------------------------------------------------------------------------------------------------------------------------------------------------------------------|-----------------------------------------------------------------------------------------------------------------------------------------------------------------------------------------|
| Optimized Neutral structure |                                                                                                                                                                                      |                                                                                                                                                                                         |                                                                                                                                                                                         |                                                                                                                                                                                            |                                                                                                                                                                                         |
| Structural Polymorphism     | $\beta$ -pyranose ( $^2C_5$ -chair) + (1)(3)(intra)H <sub>2</sub> O + (intra)H <sub>2</sub> O + (intra)H <sub>2</sub> O + (1)(2)(intra)H <sub>2</sub> O + (3)(4)H <sub>2</sub> O     | $\beta$ -pyranose ( $^2C_5$ -chair) + (1)(2)(intra)H <sub>2</sub> O + (3)(intra)H <sub>2</sub> O + (1)(3)(intra)H <sub>2</sub> O + (intra)H <sub>2</sub> O + (4)(intra)H <sub>2</sub> O | $\beta$ -pyranose ( $^2C_5$ -chair) + (1)(3)(intra)H <sub>2</sub> O + (1)(intra)H <sub>2</sub> O + (3)(intra)H <sub>2</sub> O + (intra)H <sub>2</sub> O + (intra)H <sub>2</sub> O       | $\alpha$ -furanose (C <sub>4</sub> -endo) + (4)(intra)H <sub>2</sub> O + (4)(intra)H <sub>2</sub> O + (6)(intra)H <sub>2</sub> O + (3)(6)(intra)H <sub>2</sub> O + (intra)H <sub>2</sub> O | $\beta$ -pyranose ( $^2C_5$ -chair) + (1)(intra)H <sub>2</sub> O + (1)(intra)H <sub>2</sub> O + (3)(intra)H <sub>2</sub> O + (intra)H <sub>2</sub> O + (3)(4)H <sub>2</sub> O           |
| $\Delta E$ (eV)             | 0.00                                                                                                                                                                                 | 0.02                                                                                                                                                                                    | 0.02                                                                                                                                                                                    | 0.05                                                                                                                                                                                       | 0.09                                                                                                                                                                                    |
| Optimized Neutral structure |                                                                                                                                                                                      |                                                                                                                                                                                         |                                                                                                                                                                                         |                                                                                                                                                                                            |                                                                                                                                                                                         |
| Structural Polymorphism     | $\alpha$ -furanose (C <sub>4</sub> -endo) + (3)(intra)H <sub>2</sub> O + (4)(intra)H <sub>2</sub> O + (6)(intra)H <sub>2</sub> O + (intra)H <sub>2</sub> O + (intra)H <sub>2</sub> O | pyranose ( $^2C_5$ -chair) + (1)(2) H <sub>2</sub> O + (1)(intra)H <sub>2</sub> O + (4)(intra)H <sub>2</sub> O + (3)(4)H <sub>2</sub> O + (intra)H <sub>2</sub> O                       | open chain (C) + (1)(intra)H <sub>2</sub> O + (2)(intra)H <sub>2</sub> O + (4)(intra)H <sub>2</sub> O + (intra)H <sub>2</sub> O + (intra)H <sub>2</sub> O                               | open chain (A) + (1)(intra)H <sub>2</sub> O + (3)(intra)H <sub>2</sub> O + (intra)H <sub>2</sub> O + (intra)H <sub>2</sub> O + (intra)H <sub>2</sub> O                                     | open chain (A) + (1)(3)(intra)H <sub>2</sub> O + (1)(intra)H <sub>2</sub> O + (4)(intra)H <sub>2</sub> O + (5)(intra)H <sub>2</sub> O + (intra)H <sub>2</sub> O                         |
| $\Delta E$ (eV)             | 0.10                                                                                                                                                                                 | 0.10                                                                                                                                                                                    | 0.11                                                                                                                                                                                    | 0.12                                                                                                                                                                                       | 0.12                                                                                                                                                                                    |
| Optimized Neutral structure |                                                                                                                                                                                      |                                                                                                                                                                                         |                                                                                                                                                                                         |                                                                                                                                                                                            |                                                                                                                                                                                         |
| Structural Polymorphism     | open chain (A) + (1)(intra)H <sub>2</sub> O + (4)(intra)H <sub>2</sub> O + (intra)H <sub>2</sub> O + (intra)H <sub>2</sub> O + (intra)H <sub>2</sub> O                               | open chain (A) + (1)(intra)H <sub>2</sub> O + (2)(intra)H <sub>2</sub> O + (3)(intra)H <sub>2</sub> O + (intra)H <sub>2</sub> O + (intra)H <sub>2</sub> O                               | $\beta$ -pyranose ( $^2C_5$ -chair) + (2)(3)(intra)H <sub>2</sub> O + (1)(intra)H <sub>2</sub> O + (3)(4)(intra)H <sub>2</sub> O + (4)(intra)H <sub>2</sub> O + (intra)H <sub>2</sub> O | open chain (A) + (1)(2)(intra)H <sub>2</sub> O + (1)(4)(intra)H <sub>2</sub> O + (intra)H <sub>2</sub> O + (intra)H <sub>2</sub> O + (intra)H <sub>2</sub> O                               | $\alpha$ -furanose (C <sub>4</sub> -endo) + (3)(intra)H <sub>2</sub> O + (3)(intra)H <sub>2</sub> O + (4)(intra)H <sub>2</sub> O + (6)(intra)H <sub>2</sub> O + (intra)H <sub>2</sub> O |
| $\Delta E$ (eV)             | 0.14                                                                                                                                                                                 | 0.15                                                                                                                                                                                    | 0.19                                                                                                                                                                                    | 0.20                                                                                                                                                                                       | 0.23                                                                                                                                                                                    |
| Optimized Neutral structure |                                                                                                                                                                                      |                                                                                                                                                                                         |                                                                                                                                                                                         |                                                                                                                                                                                            |                                                                                                                                                                                         |
| Structural Polymorphism     | $\beta$ -pyranose ( $^2C_5$ -chair) + (1)(3)(intra)H <sub>2</sub> O + (1)(intra)H <sub>2</sub> O + (2)(3)(intra)H <sub>2</sub> O + (intra)H <sub>2</sub> O + (intra)H <sub>2</sub> O | open chain (C) + (1)(intra)H <sub>2</sub> O + (2)(intra)H <sub>2</sub> O + (3)H <sub>2</sub> O + (4)(intra)H <sub>2</sub> O + (intra)H <sub>2</sub> O                                   | open chain (A) + (1)(intra)H <sub>2</sub> O + (1)(2)(intra)H <sub>2</sub> O + (3)(intra)H <sub>2</sub> O + (intra)H <sub>2</sub> O + (3)(intra)H <sub>2</sub> O                         | open chain (C) + (1)(4)(intra)H <sub>2</sub> O + (2)(intra)H <sub>2</sub> O + (intra)H <sub>2</sub> O + (intra)H <sub>2</sub> O + (1)(3)H <sub>2</sub> O                                   | open chain (A) + (1)(intra)H <sub>2</sub> O + (2)(intra)H <sub>2</sub> O + (intra)H <sub>2</sub> O + (intra)H <sub>2</sub> O + (intra)H <sub>2</sub> O                                  |



| $\Delta E$ (eV)             | 0.23                                                                                                                                                                                    | 0.23                                                                                                                                                                                          | 0.26                                                                                                                                                                                                    | 0.26                                                                                                                                                                                                          | 0.26                                                                                                                                                            |
|-----------------------------|-----------------------------------------------------------------------------------------------------------------------------------------------------------------------------------------|-----------------------------------------------------------------------------------------------------------------------------------------------------------------------------------------------|---------------------------------------------------------------------------------------------------------------------------------------------------------------------------------------------------------|---------------------------------------------------------------------------------------------------------------------------------------------------------------------------------------------------------------|-----------------------------------------------------------------------------------------------------------------------------------------------------------------|
| Optimized Neutral structure | 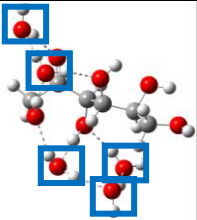                                                                                                       |                                                                                                              |                                                                                                                       |                                                                                                                            |                                                                              |
| Structural Polymorphism     | open chain (C) + (1)(4)(intra)H <sub>2</sub> O + (1)(3)(intra)H <sub>2</sub> O + (2)(intra)H <sub>2</sub> O + (3)(intra)H <sub>2</sub> O + (intra)H <sub>2</sub> O                      | $\alpha$ -furanose (C <sub>4</sub> -endo) + (1)(3)(intra)H <sub>2</sub> O + (3)(intra)H <sub>2</sub> O + (3)(6)(intra)H <sub>2</sub> O + (6)(intra)H <sub>2</sub> O + (intra)H <sub>2</sub> O | $\alpha$ -furanose (C <sub>4</sub> -endo) + (3)(intra)H <sub>2</sub> O + (4)(intra)H <sub>2</sub> O + (6)(intra)H <sub>2</sub> O + (intra)H <sub>2</sub> O                                              | open chain (A) + (1)(intra)H <sub>2</sub> O + (1)(intra)H <sub>2</sub> O + (2)(intra)H <sub>2</sub> O + (intra)H <sub>2</sub> O + (intra)H <sub>2</sub> O                                                     | open chain (B) + (1)(intra)H <sub>2</sub> O + (2)(intra)H <sub>2</sub> O + (1)(3)(intra)H <sub>2</sub> O + (3)(intra)H <sub>2</sub> O + (intra)H <sub>2</sub> O |
| $\Delta E$ (eV)             | 0.27                                                                                                                                                                                    | 0.27                                                                                                                                                                                          | 0.29                                                                                                                                                                                                    | 0.31                                                                                                                                                                                                          | 0.33                                                                                                                                                            |
| Optimized Neutral structure |                                                                                                        |                                                                                                              |                                                                                                                       |                                                                                                                            |                                                                              |
| Structural Polymorphism     | $\alpha$ -furanose (C <sub>4</sub> -endo) + (3)(intra)H <sub>2</sub> O + (4)(intra)H <sub>2</sub> O + (4)(6)(intra)H <sub>2</sub> O + (intra)H <sub>2</sub> O + (intra)H <sub>2</sub> O | open chain (A) + (1)(intra)H <sub>2</sub> O + (1)(intra)H <sub>2</sub> O + (intra)H <sub>2</sub> O + (intra)H <sub>2</sub> O + (intra)H <sub>2</sub> O                                        | $\alpha$ -furanose (C <sub>4</sub> -endo) + (3)(intra)H <sub>2</sub> O + (4)(intra)H <sub>2</sub> O + (6)(intra)H <sub>2</sub> O + (intra)H <sub>2</sub> O                                              | $\beta$ -pyranose ( <sup>2</sup> C <sub>5</sub> -chair) + (2)(3)(intra)H <sub>2</sub> O + (1)(intra)H <sub>2</sub> O + (1)(3)(intra)H <sub>2</sub> O + (3)(4)(intra)H <sub>2</sub> O + (4)(5)H <sub>2</sub> O | open chain (A) + (1)(intra)H <sub>2</sub> O + (2)(intra)H <sub>2</sub> O + (intra)H <sub>2</sub> O + (3)(intra)H <sub>2</sub> O + (intra)H <sub>2</sub> O       |
| $\Delta E$ (eV)             | 0.33                                                                                                                                                                                    | 0.34                                                                                                                                                                                          | 0.34                                                                                                                                                                                                    | 0.35                                                                                                                                                                                                          | 0.37                                                                                                                                                            |
| Optimized Neutral structure |                                                                                                      |                                                                                                            |                                                                                                                     |                                                                                                                          |                                                                            |
| Structural Polymorphism     | open chain (A) + (1)(intra)H <sub>2</sub> O + (2)(intra)H <sub>2</sub> O + (1)(3)(intra)H <sub>2</sub> O + (3)(intra)H <sub>2</sub> O + (intra)H <sub>2</sub> O                         | open chain (A) + (1)(2)(intra)H <sub>2</sub> O + (1)(intra)H <sub>2</sub> O + (3)(intra)H <sub>2</sub> O + (intra)H <sub>2</sub> O + (5)(6)H <sub>2</sub> O                                   | $\beta$ -pyranose ( <sup>2</sup> C <sub>5</sub> -chair) + (2)(3)(intra)H <sub>2</sub> O + (1)(intra)H <sub>2</sub> O + (1)(3)H <sub>2</sub> O + (3)(4)(intra)H <sub>2</sub> O + (intra)H <sub>2</sub> O | open chain (B) + (1)(intra)H <sub>2</sub> O + (1)(3)(intra)H <sub>2</sub> O + (3)(intra)H <sub>2</sub> O + (intra)H <sub>2</sub> O + (intra)H <sub>2</sub> O                                                  | open chain (B) + (1)(intra)H <sub>2</sub> O + (1)(3)(intra)H <sub>2</sub> O + (2)(3)(intra)H <sub>2</sub> O + (intra)H <sub>2</sub> O + (intra)H <sub>2</sub> O |
| $\Delta E$ (eV)             | 0.37                                                                                                                                                                                    | 0.39                                                                                                                                                                                          | 0.40                                                                                                                                                                                                    | 0.40                                                                                                                                                                                                          | 0.40                                                                                                                                                            |
| Optimized Neutral structure |                                                                                                      |                                                                                                            |                                                                                                                     |                                                                                                                          |                                                                            |
| Structural Polymorphism     | $\alpha$ -furanose (C <sub>4</sub> -endo) + (1)(3)(intra)H <sub>2</sub> O + (3)(4)(intra)H <sub>2</sub> O                                                                               | open chain (A) + (1)(2)(intra)H <sub>2</sub> O + (1)(intra)H <sub>2</sub> O + (2)(intra)H <sub>2</sub> O                                                                                      | open chain (A) + (1)(intra)H <sub>2</sub> O + (2)(intra)H <sub>2</sub> O + (intra)H <sub>2</sub> O                                                                                                      | open chain (A) + (1)(intra)H <sub>2</sub> O + (2)(intra)H <sub>2</sub> O + (intra)H <sub>2</sub> O                                                                                                            | open chain (A) + (1)(intra)H <sub>2</sub> O + (1)(intra)H <sub>2</sub> O + (2)(intra)H <sub>2</sub> O                                                           |

|                             |                                                                                                                                                                                   |                                                                                                                                                                             |                                                                                                                                                                                |                                                                                                                                                                                                           |                                                                                                                                                                                                    |
|-----------------------------|-----------------------------------------------------------------------------------------------------------------------------------------------------------------------------------|-----------------------------------------------------------------------------------------------------------------------------------------------------------------------------|--------------------------------------------------------------------------------------------------------------------------------------------------------------------------------|-----------------------------------------------------------------------------------------------------------------------------------------------------------------------------------------------------------|----------------------------------------------------------------------------------------------------------------------------------------------------------------------------------------------------|
|                             | (4)(6)(intra)H <sub>2</sub> O +<br>(intra)H <sub>2</sub> O +<br>(intra)H <sub>2</sub> O                                                                                           | (3)(intra)H <sub>2</sub> O +<br>(intra)H <sub>2</sub> O                                                                                                                     | (intra)H <sub>2</sub> O +<br>(5)(6)H <sub>2</sub> O                                                                                                                            | (intra)H <sub>2</sub> O +<br>(5)(6)H <sub>2</sub> O                                                                                                                                                       | (intra)H <sub>2</sub> O +<br>(intra)H <sub>2</sub> O                                                                                                                                               |
| $\Delta E$ (eV)             | 0.42                                                                                                                                                                              | 0.43                                                                                                                                                                        | 0.43                                                                                                                                                                           | 0.43                                                                                                                                                                                                      | 0.43                                                                                                                                                                                               |
| Optimized Neutral structure | 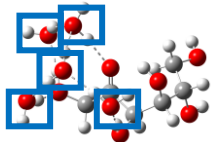                                                                                                 |                                                                                            |                                                                                              |                                                                                                                        |                                                                                                                 |
| Structural Polymorphism     | open chain (C) +<br>(1)(intra)H <sub>2</sub> O +<br>(1)(intra)H <sub>2</sub> O +<br>(2)(intra)H <sub>2</sub> O +<br>(3)(intra)H <sub>2</sub> O +<br>(intra)H <sub>2</sub> O       | open chain (A) +<br>(1)(intra)H <sub>2</sub> O +<br>(3)(intra)H <sub>2</sub> O +<br>(1)(3)(intra)H <sub>2</sub> O +<br>(intra)H <sub>2</sub> O +<br>(intra)H <sub>2</sub> O | open chain (A) +<br>(1)(intra)H <sub>2</sub> O +<br>(1)(intra)H <sub>2</sub> O +<br>(2)(intra)H <sub>2</sub> O +<br>(intra)H <sub>2</sub> O +<br>(3)H <sub>2</sub> O           | open chain (A) +<br>(1)(intra)H <sub>2</sub> O +<br>(1)(intra)H <sub>2</sub> O +<br>(2)(intra)H <sub>2</sub> O +<br>(intra)H <sub>2</sub> O +<br>(intra)H <sub>2</sub> O                                  | open chain (B) +<br>(1)(2)(intra)H <sub>2</sub> O +<br>(1)(3)(intra)H <sub>2</sub> O +<br>(3)(intra)H <sub>2</sub> O +<br>(intra)H <sub>2</sub> O +<br>(3)(6)(intra)H <sub>2</sub> O               |
| $\Delta E$ (eV)             | 0.44                                                                                                                                                                              | 0.45                                                                                                                                                                        | 0.45                                                                                                                                                                           | 0.45                                                                                                                                                                                                      | 0.45                                                                                                                                                                                               |
| Optimized Neutral structure |                                                                                                  |                                                                                            |                                                                                              |                                                                                                                        |                                                                                                                 |
| Structural Polymorphism     | open chain (A) +<br>(1)(3)(intra)H <sub>2</sub> O +<br>(2)(intra)H <sub>2</sub> O +<br>(intra)H <sub>2</sub> O +<br>(intra)H <sub>2</sub> O +<br>(intra)H <sub>2</sub> O          | open chain (A) +<br>(1)(intra)H <sub>2</sub> O +<br>(2)(intra)H <sub>2</sub> O +<br>(intra)H <sub>2</sub> O +<br>(1)(3)H <sub>2</sub> O +<br>(5)(6)H <sub>2</sub> O         | open chain (A) +<br>(1)(intra)H <sub>2</sub> O +<br>(2)(intra)H <sub>2</sub> O +<br>(intra)H <sub>2</sub> O +<br>(1)(3)H <sub>2</sub> O +<br>(5)(6)H <sub>2</sub> O            | $\beta$ -pyranose ( <sup>2</sup> C <sub>5</sub> -chair) + (1)(3)H <sub>2</sub> O +<br>(3)(4)(intra)H <sub>2</sub> O +<br>(intra)H <sub>2</sub> O +<br>(intra)H <sub>2</sub> O +<br>(4)(5)H <sub>2</sub> O | open chain (A) +<br>(1)(2)H <sub>2</sub> O +<br>(1)(intra)H <sub>2</sub> O +<br>(3)(intra)H <sub>2</sub> O +<br>(4)(5)(intra)H <sub>2</sub> O +<br>(6)(intra)H <sub>2</sub> O                      |
| $\Delta E$ (eV)             | 0.46                                                                                                                                                                              | 0.47                                                                                                                                                                        | 0.47                                                                                                                                                                           | 0.48                                                                                                                                                                                                      | 0.52                                                                                                                                                                                               |
| Optimized Neutral structure |                                                                                                |                                                                                          |                                                                                            |                                                                                                                      |                                                                                                               |
| Structural Polymorphism     | open chain (C) +<br>(1)(2)(intra)H <sub>2</sub> O +<br>(3)(intra)H <sub>2</sub> O +<br>(1)(3)(intra)H <sub>2</sub> O +<br>(intra)H <sub>2</sub> O +<br>(3)(intra)H <sub>2</sub> O | open chain (A) +<br>(1)(intra)H <sub>2</sub> O +<br>(2)(intra)H <sub>2</sub> O +<br>(intra)H <sub>2</sub> O +<br>(5)(6)H <sub>2</sub> O +<br>(intra)H <sub>2</sub> O        | open chain (C) +<br>(1)(intra)H <sub>2</sub> O +<br>(2)(intra)H <sub>2</sub> O +<br>(3)(5)(intra)H <sub>2</sub> O +<br>(6)(intra)H <sub>2</sub> O +<br>(intra)H <sub>2</sub> O | open chain (C) +<br>(1)(2)(intra)H <sub>2</sub> O +<br>(3)(intra)H <sub>2</sub> O +<br>(1)(3)(intra)H <sub>2</sub> O +<br>(intra)H <sub>2</sub> O +<br>(intra)H <sub>2</sub> O                            | $\alpha$ -furanose (C <sub>4</sub> -endo) +<br>(1)(intra)H <sub>2</sub> O +<br>(1)(intra)H <sub>2</sub> O +<br>(3)(intra)H <sub>2</sub> O +<br>(intra)H <sub>2</sub> O +<br>(4)(6)H <sub>2</sub> O |
| $\Delta E$ (eV)             | 0.52                                                                                                                                                                              | 0.52                                                                                                                                                                        | 0.55                                                                                                                                                                           | 0.56                                                                                                                                                                                                      | 0.59                                                                                                                                                                                               |
| Optimized Neutral structure |                                                                                                |                                                                                          |                                                                                            |                                                                                                                      |                                                                                                                                                                                                    |
| Structural Polymorphism     | open chain (B) +<br>(1)(intra)H <sub>2</sub> O +                                                                                                                                  | open chain (A) +<br>(2)(intra)H <sub>2</sub> O +                                                                                                                            | $\alpha$ -furanose (C <sub>4</sub> -endo) +                                                                                                                                    | open chain (A) +<br>(1)(intra)H <sub>2</sub> O +                                                                                                                                                          |                                                                                                                                                                                                    |

|                 |                                                                                                                     |                                                                                                                               |                                                                                                                                                           |                                                                                                                         |  |
|-----------------|---------------------------------------------------------------------------------------------------------------------|-------------------------------------------------------------------------------------------------------------------------------|-----------------------------------------------------------------------------------------------------------------------------------------------------------|-------------------------------------------------------------------------------------------------------------------------|--|
|                 | (1)(intra)H <sub>2</sub> O +<br>(2)(intra)H <sub>2</sub> O +<br>(intra)H <sub>2</sub> O +<br>(1)(3)H <sub>2</sub> O | (4)(intra)H <sub>2</sub> O +<br>(4)(5)(6)(intra)H <sub>2</sub> O<br>+ (6)(intra)H <sub>2</sub> O +<br>(intra)H <sub>2</sub> O | (1)(intra)H <sub>2</sub> O +<br>(1)(3)(intra)H <sub>2</sub> O +<br>(3)(intra)H <sub>2</sub> O +<br>(6)(intra)H <sub>2</sub> O +<br>(4)(6)H <sub>2</sub> O | (2)(intra)H <sub>2</sub> O +<br>(2)(3)(intra)H <sub>2</sub> O +<br>(intra)H <sub>2</sub> O +<br>(intra)H <sub>2</sub> O |  |
| $\Delta E$ (eV) | 0.61                                                                                                                | 0.63                                                                                                                          | 0.70                                                                                                                                                      | 0.76                                                                                                                    |  |

Figure S15 Optimized geometries of the typical low lying neutral isomers of (fructose+(H<sub>2</sub>O)<sub>5</sub>) based on B3LYP/6-31++G(d) calculations. The relative energies and structural polymorphs are indicated. The blue squares indicate addition of H<sub>2</sub>O units at the marked position. The C ordering is the same as that of fructose<sup>-</sup> parent anions. For open chain structures (1)C to (6)C is ordered from left to right. For both furanose and pyranose structures (1)C to (6)C is ordered from right to left in a clockwise direction.

|                             |                                                                                   |                                                                                |                                                                                |                                                                                |                                                               |
|-----------------------------|-----------------------------------------------------------------------------------|--------------------------------------------------------------------------------|--------------------------------------------------------------------------------|--------------------------------------------------------------------------------|---------------------------------------------------------------|
| Optimized Anionic structure |                                                                                   |                                                                                |                                                                                |                                                                                |                                                               |
| Structural Polymorphism     | Open chain (A)+(1)(2)H <sub>2</sub> O                                             | Open chain (A)+(1)(2)H <sub>2</sub> O                                          | Open chain (A)+(3)H <sub>2</sub> O                                             | Open chain (A)+(2)(4)(6)H <sub>2</sub> O                                       | Open chain (B)+(1)(2)H <sub>2</sub> O                         |
| $\Delta E$ (eV)             | 0.00                                                                              | 0.06                                                                           | 0.17                                                                           | 0.19                                                                           | 0.39                                                          |
| VDE (eV)                    | <b>2.24</b>                                                                       | <b>2.33</b>                                                                    | <b>2.16</b>                                                                    | <b>2.30</b>                                                                    | <b>1.90</b>                                                   |
| Optimized Anionic structure |                                                                                   |                                                                                |                                                                                |                                                                                |                                                               |
| Structural Polymorphism     | Open chain (C)+(1)(2)H <sub>2</sub> O                                             | Open chain (C)+(3)(5)H <sub>2</sub> O                                          | Open chain (C)+(5)(6)H <sub>2</sub> O                                          | $\beta$ -pyranose ( <sup>2</sup> C <sub>5</sub> -chair)+(1)(3)H <sub>2</sub> O | Open chain (B)+(5)(6)H <sub>2</sub> O                         |
| $\Delta E$ (eV)             | 0.42                                                                              | 0.48                                                                           | 0.48                                                                           | 0.53                                                                           | 0.61                                                          |
| VDE (eV)                    | <b>1.82</b>                                                                       | <b>1.70</b>                                                                    | <b>1.77</b>                                                                    | <b>0.20</b>                                                                    | <b>1.70</b>                                                   |
| Optimized Anionic structure |                                                                                   |                                                                                |                                                                                |                                                                                |                                                               |
| Structural Polymorphism     | $\beta$ -pyranose ( <sup>2</sup> C <sub>5</sub> -chair)+(1)(2)(3)H <sub>2</sub> O | $\beta$ -pyranose ( <sup>2</sup> C <sub>5</sub> -chair)+(3)(4)H <sub>2</sub> O | $\beta$ -pyranose ( <sup>2</sup> C <sub>5</sub> -chair)+(4)(5)H <sub>2</sub> O | $\alpha$ -furanose (C <sub>4</sub> -endo)+(3)(4)H <sub>2</sub> O               | $\alpha$ -furanose (C <sub>4</sub> -endo)+(1)H <sub>2</sub> O |
| $\Delta E$ (eV)             | 0.63                                                                              | 0.69                                                                           | 0.69                                                                           | 0.76                                                                           | 0.89                                                          |
| VDE (eV)                    | <b>0.26</b>                                                                       | <b>0.19</b>                                                                    | <b>0.29</b>                                                                    | <b>0.36</b>                                                                    | <b>0.39</b>                                                   |
| Optimized Anionic structure |                                                                                   |                                                                                |                                                                                |                                                                                |                                                               |
| Structural Polymorphism     | $\alpha$ -furanose (C <sub>4</sub> -endo)+(1)(2)H <sub>2</sub> O                  |                                                                                |                                                                                |                                                                                |                                                               |
| $\Delta E$ (eV)             | 1.04                                                                              |                                                                                |                                                                                |                                                                                |                                                               |
| VDE (eV)                    | <b>0.10</b>                                                                       |                                                                                |                                                                                |                                                                                |                                                               |

Figure S16 Optimized geometries of the typical low lying anionic isomers of (fructose+H<sub>2</sub>O)<sup>-</sup> based on M062X/6-311++G(d,p) calculations. The relative energies and structural polymorphs are indicated. The blue squares indicate addition of H<sub>2</sub>O units at the marked position. The C ordering is the same as that of fructose<sup>-</sup> parent anions. For open chain structures (1)C to (6)C is ordered from left to right. For both furanose and pyranose structures (1)C to (6)C is ordered from right to left in a clockwise direction.

|                             |                                                                                                             |                                                                                                               |                                                                                                            |                                                                                       |                                                                                                            |
|-----------------------------|-------------------------------------------------------------------------------------------------------------|---------------------------------------------------------------------------------------------------------------|------------------------------------------------------------------------------------------------------------|---------------------------------------------------------------------------------------|------------------------------------------------------------------------------------------------------------|
| Optimized Anionic structure | 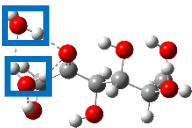                           |                              |                          |    |                         |
| Structural Polymorphism     | open chain (A)<br>+(1)(2)(intra)H <sub>2</sub> O+<br>(2)(intra)H <sub>2</sub> O                             | open chain (A)<br>+(1)(2)H <sub>2</sub> O+(1)(3)<br>H <sub>2</sub> O                                          | open chain (A)<br>+(1)(2)H <sub>2</sub> O+(4)(5)<br>(6)H <sub>2</sub> O                                    | open chain (A)<br>+(1)(intra)H <sub>2</sub> O+(2)(<br>intra)H <sub>2</sub> O          | open chain (A)<br>+(1)(2)(intra)H <sub>2</sub> O<br>+(intra)H <sub>2</sub> O                               |
| ΔE (eV)                     | 0.00                                                                                                        | 0.03                                                                                                          | 0.07                                                                                                       | 0.08                                                                                  | 0.13                                                                                                       |
| VDE (eV)                    | <b>2.40</b>                                                                                                 | <b>2.22</b>                                                                                                   | <b>2.28</b>                                                                                                | <b>2.56</b>                                                                           | <b>2.62</b>                                                                                                |
| Optimized Anionic structure |                            |                              |                          |    |                         |
| Structural Polymorphism     | open chain (A)<br>+(4)(6)H <sub>2</sub> O+(2)(int<br>ra)H <sub>2</sub> O                                    | open chain (A)<br>+(3)H <sub>2</sub> O+(4)(5)(6)<br>H <sub>2</sub> O                                          | open chain (C)<br>+(3)(5)H <sub>2</sub> O+(4)(6)<br>H <sub>2</sub> O                                       | open chain (C)<br>+(1)(2)(intra)H <sub>2</sub> O+(<br>1)(2)(intra)H <sub>2</sub> O    | open chain (B)<br>+(1)(2)H <sub>2</sub> O+(1)(<br>3)H <sub>2</sub> O                                       |
| ΔE (eV)                     | 0.14                                                                                                        | 0.23                                                                                                          | 0.33                                                                                                       | 0.35                                                                                  | 0.37                                                                                                       |
| VDE (eV)                    | <b>2.53</b>                                                                                                 | <b>2.50</b>                                                                                                   | <b>2.18</b>                                                                                                | <b>2.32</b>                                                                           | <b>2.22</b>                                                                                                |
| Optimized Anionic structure |                            |                              |                          |    |                         |
| Structural Polymorphism     | open chain (B)<br>+(1)(2)(intra)H <sub>2</sub> O+<br>(2)(intra)H <sub>2</sub> O                             | open chain (C)<br>+(1)(2)H <sub>2</sub> O+(2)(intr<br>a)H <sub>2</sub> O                                      | open chain (C)<br>+(3)(5)H <sub>2</sub> O+(1)(2)<br>H <sub>2</sub> O                                       | open chain (B)<br>+(1)(2)H <sub>2</sub> O+(5)(6)H<br><sub>2</sub> O                   | open chain (C)<br>+(1)(2)H <sub>2</sub> O+(5)(<br>6)H <sub>2</sub> O                                       |
| ΔE (eV)                     | 0.37                                                                                                        | 0.40                                                                                                          | 0.41                                                                                                       | 0.43                                                                                  | 0.46                                                                                                       |
| VDE (eV)                    | <b>2.18</b>                                                                                                 | <b>2.16</b>                                                                                                   | <b>2.04</b>                                                                                                | <b>2.31</b>                                                                           | <b>2.17</b>                                                                                                |
| Optimized Anionic structure |                          |                            |                        |  |                       |
| Structural Polymorphism     | open chain (C)<br>+(1)(2)H <sub>2</sub> O+(1)(3)<br>H <sub>2</sub> O                                        | β-pyranose ( <sup>2</sup> C <sub>5</sub> -<br>chair)<br>+(1)(2)(3)H <sub>2</sub> O+(1)(<br>3)H <sub>2</sub> O | β-pyranose ( <sup>2</sup> C <sub>5</sub> -<br>chair)<br>+(1)(3)H <sub>2</sub> O+(3)(4)<br>H <sub>2</sub> O | open chain (B)<br>+(1)(2)H <sub>2</sub> O+(5)(6)H<br><sub>2</sub> O                   | β-pyranose ( <sup>2</sup> C <sub>5</sub> -<br>chair)<br>+(1)(3)H <sub>2</sub> O+(4)(<br>5)H <sub>2</sub> O |
| ΔE (eV)                     | 0.46                                                                                                        | 0.54                                                                                                          | 0.56                                                                                                       | 0.57                                                                                  | 0.61                                                                                                       |
| VDE (eV)                    | <b>1.84</b>                                                                                                 | <b>0.39</b>                                                                                                   | <b>0.60</b>                                                                                                | <b>1.98</b>                                                                           | <b>0.59</b>                                                                                                |
| Optimized Anionic structure |                          |                            |                        |                                                                                       |                                                                                                            |
| Structural Polymorphism     | β-pyranose ( <sup>2</sup> C <sub>5</sub> -<br>chair)<br>+(1)(3)H <sub>2</sub> O+(intra)<br>H <sub>2</sub> O | α- furanose (C <sub>4</sub> -<br>endo)<br>+(3)(intra)H <sub>2</sub> O+<br>(4)(intra)H <sub>2</sub> O          | α- furanose (C <sub>4</sub> -<br>endo)<br>+(1)(3)H <sub>2</sub> O+(3)(4)<br>H <sub>2</sub> O               |                                                                                       |                                                                                                            |
| ΔE (eV)                     | 0.73                                                                                                        | 0.86                                                                                                          | 0.88                                                                                                       |                                                                                       |                                                                                                            |
| VDE (eV)                    | <b>0.37</b>                                                                                                 | <b>0.76</b>                                                                                                   | <b>0.70</b>                                                                                                |                                                                                       |                                                                                                            |

Figure S17 Optimized geometries of the typical low lying anionic isomers of  $(\text{fructose} + (\text{H}_2\text{O})_2)^-$  based on M062X/6-311++G(d,p) calculations. The relative energies and structural polymorphs are indicated. The blue squares indicate addition of  $\text{H}_2\text{O}$  units at the marked position. The C ordering is the same as that of fructose<sup>-</sup> parent anions. For open chain structures (1)C to (6)C is ordered from left to right. For both furanose and pyranose structures (1)C to (6)C is ordered from right to left in a clockwise direction.

|                             |                                                                                                                      |                                                                                                                     |                                                                                                     |                                                                                                                                      |                                                                                                                               |
|-----------------------------|----------------------------------------------------------------------------------------------------------------------|---------------------------------------------------------------------------------------------------------------------|-----------------------------------------------------------------------------------------------------|--------------------------------------------------------------------------------------------------------------------------------------|-------------------------------------------------------------------------------------------------------------------------------|
| Optimized Anionic structure |                                                                                                                      |                                                                                                                     |                                                                                                     |                                                                                                                                      |                                                                                                                               |
| Structural Polymorphism     | open chain (A)<br>+(1)(2)(intra)H <sub>2</sub> O+(2)(intra)H <sub>2</sub> O+(intra)H <sub>2</sub> O                  | open chain (A)<br>+(1)(2)H <sub>2</sub> O+(1)(3)H <sub>2</sub> O+(intra)H <sub>2</sub> O                            | open chain (A)<br>+(1)(2)H <sub>2</sub> O+(2)(intra)H <sub>2</sub> O+(4)(5)(6)H <sub>2</sub> O      | open chain (A)<br>+(1)(2)H <sub>2</sub> O+(1)(3)H <sub>2</sub> O+(2)(intra)H <sub>2</sub> O                                          | open chain (A)<br>+(4)(5)(6)H <sub>2</sub> O+(4)(6)(intra)H <sub>2</sub> O+(2)(intra)H <sub>2</sub> O                         |
| ΔE (eV)                     | 0.00                                                                                                                 | 0.03                                                                                                                | 0.04                                                                                                | 0.05                                                                                                                                 | 0.08                                                                                                                          |
| VDE (eV)                    | <b>2.61</b>                                                                                                          | <b>2.50</b>                                                                                                         | <b>2.57</b>                                                                                         | <b>2.67</b>                                                                                                                          | <b>2.76</b>                                                                                                                   |
| Optimized Anionic structure |                                                                                                                      |                                                                                                                     |                                                                                                     |                                                                                                                                      |                                                                                                                               |
| Structural Polymorphism     | open chain (A)<br>+(1)(2)H <sub>2</sub> O+(1)(3)H <sub>2</sub> O+(4)(5)H <sub>2</sub> O                              | open chain (A)<br>+(1)(intra)H <sub>2</sub> O+(2)(intra)H <sub>2</sub> O+(intra)H <sub>2</sub> O                    | open chain (A)<br>+(1)(intra)H <sub>2</sub> O+(2)(intra)H <sub>2</sub> O+(4)(5)H <sub>2</sub> O     | open chain (A)<br>+(4)(6)(intra)H <sub>2</sub> O+(2)(intra)H <sub>2</sub> O+(1)(intra)H <sub>2</sub> O                               | open chain (A)<br>+(4)(6)(intra)H <sub>2</sub> O+(4)(5)(intra)H <sub>2</sub> O+(intra)H <sub>2</sub> O                        |
| ΔE (eV)                     | 0.12                                                                                                                 | 0.21                                                                                                                | 0.22                                                                                                | 0.23                                                                                                                                 | 0.25                                                                                                                          |
| VDE (eV)                    | <b>2.41</b>                                                                                                          | <b>2.76</b>                                                                                                         | <b>3.00</b>                                                                                         | <b>2.76</b>                                                                                                                          | <b>2.39</b>                                                                                                                   |
| Optimized Anionic structure |                                                                                                                      |                                                                                                                     |                                                                                                     |                                                                                                                                      |                                                                                                                               |
| Structural Polymorphism     | open chain (C)<br>+(1)(2)(intra)H <sub>2</sub> O+(2)(intra)H <sub>2</sub> O+(3)(5)H <sub>2</sub> O                   | open chain (B)<br>+(1)(2)(intra)H <sub>2</sub> O+(2)(intra)H <sub>2</sub> O+(intra)H <sub>2</sub> O                 | open chain (C)<br>+(1)(2)(intra)H <sub>2</sub> O+(2)(intra)H <sub>2</sub> O+(intra)H <sub>2</sub> O | β-pyranose ( <sup>2</sup> C <sub>5</sub> -chair)<br>+(1)(3)H <sub>2</sub> O+(2)(3)(intra)H <sub>2</sub> O+(1)(intra)H <sub>2</sub> O | β-pyranose ( <sup>2</sup> C <sub>5</sub> -chair)<br>+(3)(4)H <sub>2</sub> O+(3)(3)(intra)H <sub>2</sub> O+(1)H <sub>2</sub> O |
| ΔE (eV)                     | 0.36                                                                                                                 | 0.38                                                                                                                | 0.43                                                                                                | 0.47                                                                                                                                 | 0.53                                                                                                                          |
| VDE (eV)                    | <b>2.44</b>                                                                                                          | <b>2.49</b>                                                                                                         | <b>2.38</b>                                                                                         | <b>0.71</b>                                                                                                                          | <b>0.95</b>                                                                                                                   |
| Optimized Anionic structure |                                                                                                                      |                                                                                                                     |                                                                                                     |                                                                                                                                      |                                                                                                                               |
| Structural Polymorphism     | α- furanose (C <sub>4</sub> -endo)<br>+(3)(intra)H <sub>2</sub> O+(4)(intra)H <sub>2</sub> O+(intra)H <sub>2</sub> O | α- furanose (C <sub>4</sub> -endo)<br>+(3)(intra)H <sub>2</sub> O+(4)(intra)H <sub>2</sub> O+(1)(2)H <sub>2</sub> O |                                                                                                     |                                                                                                                                      |                                                                                                                               |
| ΔE (eV)                     | 0.80                                                                                                                 | 0.84                                                                                                                |                                                                                                     |                                                                                                                                      |                                                                                                                               |
| VDE (eV)                    | <b>1.26</b>                                                                                                          | <b>0.85</b>                                                                                                         |                                                                                                     |                                                                                                                                      |                                                                                                                               |

Figure S18 Optimized geometries of the typical low lying anionic isomers of (fructose+(H<sub>2</sub>O)<sub>3</sub>)<sup>-</sup> based on M062X/6-31++G(d) calculations. The relative energies and structural polymorphs are indicated. The blue squares indicate addition of H<sub>2</sub>O units at the marked position. The C ordering is the same as that of fructose<sup>-</sup> parent anions. For open chain structures

(1)C to (6)C is ordered from left to right. For both furanose and pyranose structures (1)C to (6)C is ordered from right to left in a clockwise direction.



|                             |                                                                                                                                                |                                                                                                                                      |                                                                                                                                                                    |                                                                                                                                                                     |                                                                                                                                                |
|-----------------------------|------------------------------------------------------------------------------------------------------------------------------------------------|--------------------------------------------------------------------------------------------------------------------------------------|--------------------------------------------------------------------------------------------------------------------------------------------------------------------|---------------------------------------------------------------------------------------------------------------------------------------------------------------------|------------------------------------------------------------------------------------------------------------------------------------------------|
| Optimized Anionic structure | 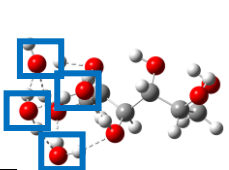                                                              |                                                     |                                                                                  |                                                                                  |                                                             |
| Structural Polymorphism     | open chain (A)<br>+(1)(2)(intra)H <sub>2</sub> O+(2)(3)(intra)H <sub>2</sub> O+(1)(3)(intra)H <sub>2</sub> O+(intra)H <sub>2</sub> O           | open chain (A)<br>+(1)(2)(intra)H <sub>2</sub> O+(1)(3)H <sub>2</sub> O+(2)(intra)H <sub>2</sub> O+(intra)H <sub>2</sub> O           | open chain (A)<br>+(1)(2)(intra)H <sub>2</sub> O+(1)(intra)H <sub>2</sub> O+(2)(intra)H <sub>2</sub> O+(intra)H <sub>2</sub> O                                     | open chain (C)<br>+(1)(2)(intra)H <sub>2</sub> O+(2)(3)(intra)H <sub>2</sub> O+(1)(3)(intra)H <sub>2</sub> O+(intra)H <sub>2</sub> O                                | open chain (A)<br>+(1)(2)(intra)H <sub>2</sub> O+(2)(intra)H <sub>2</sub> O+(intra)H <sub>2</sub> O+(4)(5)(6)H <sub>2</sub> O                  |
| ΔE (eV)                     | 0.00                                                                                                                                           | 0.23                                                                                                                                 | 0.26                                                                                                                                                               | 0.28                                                                                                                                                                | 0.29                                                                                                                                           |
| VDE (eV)                    | <b>2.89</b>                                                                                                                                    | <b>3.09</b>                                                                                                                          | <b>2.60</b>                                                                                                                                                        | <b>2.67</b>                                                                                                                                                         | <b>2.81</b>                                                                                                                                    |
| Optimized Anionic structure |                                                               |                                                     |                                                                                  |                                                                                  |                                                             |
| Structural Polymorphism     | open chain (A)<br>+(1)(2)(intra)H <sub>2</sub> O+(1)(3)(intra)H <sub>2</sub> O+(intra)H <sub>2</sub> O+(4)(5)(6)H <sub>2</sub> O               | open chain (B)<br>+(1)(2)(intra)H <sub>2</sub> O+(2)(3)(intra)H <sub>2</sub> O+(1)(3)(intra)H <sub>2</sub> O+(intra)H <sub>2</sub> O | open chain (A)<br>+(1)(2)(intra)H <sub>2</sub> O+(2)(intra)H <sub>2</sub> O+(intra)H <sub>2</sub> O+(intra)H <sub>2</sub> O                                        | open chain (A)<br>+(1)(intra)H <sub>2</sub> O+(2)(intra)H <sub>2</sub> O+(4)(6)(intra)H <sub>2</sub> O+(4)(5)(6)H <sub>2</sub> O                                    | open chain (A)<br>+(1)(intra)H <sub>2</sub> O+(2)(intra)H <sub>2</sub> O+(2)(intra)H <sub>2</sub> O+(intra)H <sub>2</sub> O                    |
| ΔE (eV)                     | 0.32                                                                                                                                           | 0.32                                                                                                                                 | 0.37                                                                                                                                                               | 0.40                                                                                                                                                                | 0.40                                                                                                                                           |
| VDE (eV)                    | <b>2.68</b>                                                                                                                                    | <b>2.67</b>                                                                                                                          | <b>3.07</b>                                                                                                                                                        | <b>2.85</b>                                                                                                                                                         | <b>3.07</b>                                                                                                                                    |
| Optimized Anionic structure |                                                              |                                                    |                                                                                 |                                                                                 |                                                            |
| Structural Polymorphism     | open chain (A)<br>+(1)(2)(intra)H <sub>2</sub> O+(2)(intra)H <sub>2</sub> O+(4)(5)(6)H <sub>2</sub> O+(intra)H <sub>2</sub> O                  | open chain (C)<br>+(1)(2)(intra)H <sub>2</sub> O+(2)(intra)H <sub>2</sub> O+(3)(5)(intra)H <sub>2</sub> O+(6)(intra)H <sub>2</sub> O | β-pyranose ( <sup>2</sup> C <sub>5</sub> -chair)<br>+(3)(4)H <sub>2</sub> O+(2)(3)(intra)H <sub>2</sub> O+(1)(3)(intra)H <sub>2</sub> O+(1)(intra)H <sub>2</sub> O | β-pyranose ( <sup>2</sup> C <sub>5</sub> -chair)<br>+(1)(3)(intra)H <sub>2</sub> O+(2)(3)(intra)H <sub>2</sub> O+(1)(intra)H <sub>2</sub> O+(intra)H <sub>2</sub> O | α-furanose (C <sub>4</sub> -endo)<br>+(3)(intra)H <sub>2</sub> O+(4)(intra)H <sub>2</sub> O+(6)(intra)H <sub>2</sub> O+(intra)H <sub>2</sub> O |
| ΔE (eV)                     | 0.47                                                                                                                                           | 0.54                                                                                                                                 | 0.77                                                                                                                                                               | 0.82                                                                                                                                                                | 1.00                                                                                                                                           |
| VDE (eV)                    | <b>2.71</b>                                                                                                                                    | <b>2.59</b>                                                                                                                          | <b>1.12</b>                                                                                                                                                        | <b>0.73</b>                                                                                                                                                         | <b>1.10</b>                                                                                                                                    |
| Optimized Anionic structure |                                                             |                                                                                                                                      |                                                                                                                                                                    |                                                                                                                                                                     |                                                                                                                                                |
| Structural Polymorphism     | α-furanose (C <sub>4</sub> -endo)<br>+(3)(intra)H <sub>2</sub> O+(4)(intra)H <sub>2</sub> O+(6)(intra)H <sub>2</sub> O+(intra)H <sub>2</sub> O |                                                                                                                                      |                                                                                                                                                                    |                                                                                                                                                                     |                                                                                                                                                |
| ΔE (eV)                     | 1.05                                                                                                                                           |                                                                                                                                      |                                                                                                                                                                    |                                                                                                                                                                     |                                                                                                                                                |
| VDE (eV)                    | <b>1.48</b>                                                                                                                                    |                                                                                                                                      |                                                                                                                                                                    |                                                                                                                                                                     |                                                                                                                                                |

Figure S19 Optimized geometries of the typical low lying anionic isomers of  $(\text{fructose} + (\text{H}_2\text{O})_4)^-$  based on M062X/6-31++G(d) calculations. The relative energies and structural polymorphs are indicated. The blue squares indicate addition of  $\text{H}_2\text{O}$  units at the marked position. The C ordering is the same as that of fructose<sup>-</sup> parent anions. For open chain structures (1)C to (6)C is ordered from left to right. For both furanose and pyranose structures (1)C to (6)C is ordered from right to left in a clockwise direction.

|                             |                                                                                                                                                                       |                                                                                                                                                                          |                                                                                                                                                                                                     |                                                                                                                                                                                                         |                                                                                                                                                                                 |
|-----------------------------|-----------------------------------------------------------------------------------------------------------------------------------------------------------------------|--------------------------------------------------------------------------------------------------------------------------------------------------------------------------|-----------------------------------------------------------------------------------------------------------------------------------------------------------------------------------------------------|---------------------------------------------------------------------------------------------------------------------------------------------------------------------------------------------------------|---------------------------------------------------------------------------------------------------------------------------------------------------------------------------------|
| Optimized Anionic structure |                                                                                                                                                                       |                                                                                                                                                                          |                                                                                                                                                                                                     |                                                                                                                                                                                                         |                                                                                                                                                                                 |
| Structural Polymorphism     | open chain (A)<br>+ (1)(2)(intra)H <sub>2</sub> O + (2)(intra)H <sub>2</sub> O + (3)(intra)H <sub>2</sub> O + (intra)H <sub>2</sub> O + (intra)H <sub>2</sub> O       | open chain (A)<br>+ (1)(2)(intra)H <sub>2</sub> O + (2)(3)(intra)H <sub>2</sub> O + (1)(3)(intra)H <sub>2</sub> O + (intra)H <sub>2</sub> O + (4)(5)(6)H <sub>2</sub> O  | open chain (A)<br>+ (1)(2)(intra)H <sub>2</sub> O + (2)(3)(intra)H <sub>2</sub> O + (1)(3)(intra)H <sub>2</sub> O + (intra)H <sub>2</sub> O + (2)H <sub>2</sub> O                                   | open chain (A)<br>+ (1)(2)(intra)H <sub>2</sub> O + (2)(3)(intra)H <sub>2</sub> O + (1)(3)(intra)H <sub>2</sub> O + (intra)H <sub>2</sub> O + (3)(intra)H <sub>2</sub> O                                | open chain (A)<br>+ (1)(2)(intra)H <sub>2</sub> O + (2)(3)(intra)H <sub>2</sub> O + (1)(3)(intra)H <sub>2</sub> O + (intra)H <sub>2</sub> O + (intra)H <sub>2</sub> O           |
| ΔE (eV)                     | 0.00                                                                                                                                                                  | 0.06                                                                                                                                                                     | 0.08                                                                                                                                                                                                | 0.09                                                                                                                                                                                                    | 0.14                                                                                                                                                                            |
| VDE (eV)                    | <b>3.16</b>                                                                                                                                                           | <b>3.13</b>                                                                                                                                                              | <b>3.20</b>                                                                                                                                                                                         | <b>3.14</b>                                                                                                                                                                                             | <b>3.12</b>                                                                                                                                                                     |
| Optimized Anionic structure |                                                                                                                                                                       |                                                                                                                                                                          |                                                                                                                                                                                                     |                                                                                                                                                                                                         |                                                                                                                                                                                 |
| Structural Polymorphism     | open chain (C)<br>+ (1)(2)(intra)H <sub>2</sub> O + (2)(3)(intra)H <sub>2</sub> O + (1)(3)(intra)H <sub>2</sub> O + (intra)H <sub>2</sub> O + (intra)H <sub>2</sub> O | open chain (A)<br>+ (1)(2)(intra)H <sub>2</sub> O + (1)(intra)H <sub>2</sub> O + (2)(intra)H <sub>2</sub> O + (intra)H <sub>2</sub> O + (1)(3)H <sub>2</sub> O           | open chain (A)<br>+ (1)(2)(intra)H <sub>2</sub> O + (1)(intra)H <sub>2</sub> O + (2)(intra)H <sub>2</sub> O + (intra)H <sub>2</sub> O + (intra)H <sub>2</sub> O                                     | open chain (B)<br>+ (1)(2)(intra)H <sub>2</sub> O + (2)(3)(intra)H <sub>2</sub> O + (1)(3)(intra)H <sub>2</sub> O + (intra)H <sub>2</sub> O + (intra)H <sub>2</sub> O                                   | open chain (A)<br>+ (1)(intra)H <sub>2</sub> O + (2)(intra)H <sub>2</sub> O + (4)(6)(intra)H <sub>2</sub> O + (4)(5)(6)(intra)H <sub>2</sub> O + (intra)H <sub>2</sub> O        |
| ΔE (eV)                     | 0.29                                                                                                                                                                  | 0.32                                                                                                                                                                     | 0.39                                                                                                                                                                                                | 0.44                                                                                                                                                                                                    | 0.47                                                                                                                                                                            |
| VDE (eV)                    | <b>2.77</b>                                                                                                                                                           | <b>3.08</b>                                                                                                                                                              | <b>2.64</b>                                                                                                                                                                                         | <b>2.89</b>                                                                                                                                                                                             | <b>3.09</b>                                                                                                                                                                     |
| Optimized Anionic structure |                                                                                                                                                                       |                                                                                                                                                                          |                                                                                                                                                                                                     |                                                                                                                                                                                                         |                                                                                                                                                                                 |
| Structural Polymorphism     | open chain (A)<br>+ (1)(2)(intra)H <sub>2</sub> O + (2)(intra)H <sub>2</sub> O + (intra)H <sub>2</sub> O + (4)(5)(6)H <sub>2</sub> O + (intra)H <sub>2</sub> O        | open chain (C)<br>+ (1)(2)(intra)H <sub>2</sub> O + (2)(intra)H <sub>2</sub> O + (3)(5)(intra)H <sub>2</sub> O + (6)(intra)H <sub>2</sub> O + (1)(intra)H <sub>2</sub> O | β-pyranose ( <sup>2</sup> C <sub>5</sub> -chair)<br>+ (3)(4)H <sub>2</sub> O + (2)(3)(intra)H <sub>2</sub> O + (1)(3)(intra)H <sub>2</sub> O + (1)(intra)H <sub>2</sub> O + (intra)H <sub>2</sub> O | β-pyranose ( <sup>2</sup> C <sub>5</sub> -chair)<br>+ (1)(3)(intra)H <sub>2</sub> O + (2)(3)(intra)H <sub>2</sub> O + (1)(intra)H <sub>2</sub> O + (intra)H <sub>2</sub> O + (3)(intra)H <sub>2</sub> O | α-furanose (C <sub>4</sub> -endo)<br>+ (3)(intra)H <sub>2</sub> O + (4)(intra)H <sub>2</sub> O + (6)(intra)H <sub>2</sub> O + (intra)H <sub>2</sub> O + (intra)H <sub>2</sub> O |
| ΔE (eV)                     | 0.48                                                                                                                                                                  | 0.64                                                                                                                                                                     | 0.83                                                                                                                                                                                                | 0.91                                                                                                                                                                                                    | 1.05                                                                                                                                                                            |
| VDE (eV)                    | <b>2.95</b>                                                                                                                                                           | <b>2.81</b>                                                                                                                                                              | <b>1.12</b>                                                                                                                                                                                         | <b>0.82</b>                                                                                                                                                                                             | <b>1.21</b>                                                                                                                                                                     |
| Optimized Anionic structure |                                                                                                                                                                       |                                                                                                                                                                          |                                                                                                                                                                                                     |                                                                                                                                                                                                         |                                                                                                                                                                                 |
| Structural Polymorphism     | α-furanose (C <sub>4</sub> -endo)<br>+ (3)(intra)H <sub>2</sub> O + (4)(intra)H <sub>2</sub> O + (6)(intra)H <sub>2</sub> O + (intra)H <sub>2</sub> O                 |                                                                                                                                                                          |                                                                                                                                                                                                     |                                                                                                                                                                                                         |                                                                                                                                                                                 |
| ΔE (eV)                     | 1.06                                                                                                                                                                  |                                                                                                                                                                          |                                                                                                                                                                                                     |                                                                                                                                                                                                         |                                                                                                                                                                                 |
| VDE (eV)                    | <b>1.48</b>                                                                                                                                                           |                                                                                                                                                                          |                                                                                                                                                                                                     |                                                                                                                                                                                                         |                                                                                                                                                                                 |

Figure S20 Optimized geometries of the typical low lying anionic isomers of  $(\text{fructose} + (\text{H}_2\text{O})_4)^-$  based on M062X/6-31++G(d) calculations. The relative energies and structural polymorphs are indicated. The blue squares indicate addition of  $\text{H}_2\text{O}$  units at the marked position. The C ordering is the same as that of fructose<sup>-</sup> parent anions. For open chain structures (1)C to (6)C is ordered from left to right. For both furanose and pyranose structures (1)C to (6)C is ordered from right to left in a clockwise direction.

Table S1 Solubility comparisons of different monosaccharides.

|              | <b>pentoses</b> |                  | <b>hexoses</b>   |                 |
|--------------|-----------------|------------------|------------------|-----------------|
| <b>Aldo-</b> | <b>ribose</b>   | <b>arabinose</b> | <b>mannose</b>   | <b>talose</b>   |
|              | 100 g/L (25 °C) | 834 g/L (25 °C)  | 2480 g/L (17 °C) | 100 g/L         |
|              |                 |                  |                  |                 |
| <b>Keto-</b> | <b>ribulose</b> |                  | <b>fructose</b>  | <b>tagatose</b> |
|              | ~678 g/L        |                  | 3750 g/L (20 °C) | ~100 g/L        |

More pentose (e.g., arabinose, ribulose...) and hexose (e.g., mannose, talose, tagatose...) aldo/keto-monosaccharides will be explored both experimentally and theoretically to compare comprehensively and systematically these uncovered behavioral differences. A few examples of such monosaccharide water cluster/solubility comparisons can be suggested that can help characterize the various monosaccharides: arabinose is an aldopentose, but with ~ 8 times greater solubility than that of ribose; tagatose, like fructose, is a ketohexose, however, it evidences similar solubility to that of ribose; ribulose (a ketopentose) whose solubility is greater than that of ribose; and mannose and talose (aldohexoses), which have solubilities of  $\sim 2 \times 10^3$  g/L and  $\sim 100$ g/L, respectively. And depending on what can be extracted from such systematic comparisons, we can anticipate a much deeper understanding of cluster vs solvation behavior. Perhaps these efforts will shed some light on the evolutionarily determined choices for various saccharides being employed for different biological applications.
